1 **Alpha-Gal Syndrome: Involvement of *Amblyomma americanum*  $\alpha$ -D-galactosidase**  
2 **and  $\alpha$ -1,4 Galactosyltransferase enzymes in  $\alpha$ -gal metabolism**

3

4 Surendra Raj Sharma<sup>1</sup>, Gary Crispell<sup>1</sup>, Ahmed Mohamed<sup>1</sup>, Cameron Cox<sup>1</sup>, Joshua  
5 Lange<sup>1</sup>, Shailesh Choudhary<sup>2</sup>, Scott P. Commins<sup>2</sup>, and Shahid Karim<sup>1,3\*</sup>

6

7

8 <sup>1</sup>School of Biological, Environment and Earth Sciences, The University of Southern  
9 Mississippi, Hattiesburg, MS 39406, USA

10

11 <sup>2</sup>Department of Medicine & Pediatrics, University of North Carolina, Chapel Hill, NC  
12 27599-7280, USA

13

14 <sup>3</sup>Center for Molecular and Cellular Biosciences, The University of Southern Mississippi,  
15 Hattiesburg, MS 39406, USA

16

17

18

19 Running title: Tick salivary genes and Alpha-Gal Syndrome

20

21

22

23 Corresponding author:

24 [Shahid.Karim@usm.edu](mailto:Shahid.Karim@usm.edu)

25

26

27

28 **Abstract**

29 Alpha-Gal Syndrome (AGS) is an IgE-mediated delayed-type hypersensitivity reaction  
30 to the oligosaccharide galactose- $\beta$ -1,3-galactose ( $\alpha$ -gal) injected into humans from the  
31 lone star tick (*Amblyomma americanum*) bite. This study aims at the functional  
32 characterization of two tick enzymes,  $\alpha$ -D-galactosidase (ADGal) and  $\alpha$ -1,4  
33 galactosyltransferase ( $\beta$ -1,4GalT) in  $\alpha$ -gal metabolism. The ADGal enzyme cleaves  
34 terminal  $\alpha$ -galactose moieties from glycoproteins and glycolipids, whereas  $\beta$ -1,4GalT  
35 transfers  $\alpha$ -galactose to a  $\beta$ 1,4 terminal linkage acceptor sugars: GlcNAc, Glc, and Xyl  
36 in various processes of glycoconjugate synthesis. An RNA interference approach was  
37 utilized to silence ADGal and  $\beta$ -1,4GalT in *Am. americanum* to examine their functional  
38 role in  $\alpha$ -gal metabolism and AGS onset. Silencing of ADGal led to the significant down-  
39 regulation of genes involved in galactose metabolism and transport in *Am. americanum*.  
40 Immunoblot and N-glycan analysis of the *Am. americanum* salivary glands showed a  
41 significant reduction in  $\beta$ -gal levels in silenced tissues. However, there was no  
42 significant difference in the level of  $\beta$ -gal in  $\beta$ -1,4GalT silenced tick salivary glands. A  
43 basophil-activation test showed a decrease in the frequency of activated basophil by  
44 ADGal silenced salivary glands. These results provide an insight into the role of  $\alpha$ -D-  
45 galactosidase &  $\beta$ -1,4GalT in tick biology and the probable involvement in the onset of  
46 AGS.

47

48 **Keywords:**  $\alpha$ -gal, tick, red meat allergy, hypersensitivity,  $\alpha$ -D-galactosidase,  $\beta$ -1,4  
49 Galactosyltransferase, N-glycan, Alpha-Gal Syndrome

50

## 51 Introduction

52 Lone star ticks (*Amblyomma americanum*) transmit a variety of viral and bacterial  
53 pathogens to mammals (Childs & Paddock, 2003; Goddard & Varela-Stokes, 2009;  
54 Sayler et al., 2014). The lone star tick is also associated with southern tick-associated  
55 rash illness (STARI), and Alpha-Gal Syndrome (AGS), a newly emerged delayed  
56 allergic reaction that occurs 3-6 hours after eating beef, pork, or lamb (Commins et al.,  
57 2011; Commins & Platts-Mills, 2013). The development of specific IgE antibodies to the  
58 oligosaccharide galactose- $\alpha$ -1,3-galactose ( $\alpha$ -gal) following the *Am. americanum* bites  
59 cause red-meat allergy (Commins et al., 2011; Van Nunen et al., 2009; Wuerdeman &  
60 Harrison, 2014; Crispell et al., 2019). Alpha-gal is found in the tissues of most  
61 mammals, including cattle, sheep, and swine but notably absent from humans and  
62 Great Apes. AGS is already common in several world regions; within 10 years the US  
63 alone has confirmed a spike in cases from 12 in 2009 to > 34,000 in 2019 (Binder et al.,  
64 2021) most strongly attributed to sensitization to  $\alpha$ -gal is *Am. americanum* (Crispell et  
65 al., 2019). Several studies have also reported the presence of  $\alpha$ -gal in the midguts of  
66 *Ixodes ricinus*, salivary glands of *Haemaphysalis longicornis*, *Am. sculptum*, and both  
67 the salivary glands and saliva of *Ixodes scapularis*, *Am. americanum* (Araujo et al.,  
68 2016; Hamesten et al., 2013a, 2013b; Chinuki et al., 2016; Crispell et al., 2019;  
69 Choudhary et al., 2021).

70 AGS is most common in areas where the *Am. americanum* has been historically  
71 prevalent and expanded into the regions (e.g., Long Island, NY, known for the  
72 prevalence of *Ix. Scapularis*) (Monzón et al., 2016; Sonenshine 2018). Range  
73 expansion of *Am. americanum* presents a significant public health threat in the  
74 northeastern US and beyond (Sonenshine 2018; Springer et al., 2015; Raghavan et al.,  
75 2019) due to its established role in pathogen transmission and its link to AGS (Monzón  
76 et al., 2016; Childs and Paddock, 2003; Sharma and Karim, 2021; Crispell et al., 2019,  
77 Commins, 2020). The unexpected increase in AGS is a unique health concern because  
78 strict avoidance of the food allergen is the only way to prevent a life-threatening allergic  
79 reaction.

80 The IgE immune response associated with food allergies is classically directed against  
81 protein antigens; however, AGS is characterized by IgE that binds to the  
82 oligosaccharide epitope galactose- $\alpha$ -1,3 galactose ( $\alpha$ -gal), a cross-reactive  
83 carbohydrate determinant (CCD), specifically found in all non-primate mammals  
84 (Aalberse et al., 1981). The  $\alpha$ -gal appears to be a common component of mammalian  
85 glycoconjugates such as glycolipids and glycoproteins. These cellular glycoconjugates  
86 are synthesized by a large family of glycosyltransferases (Berg et al., 2014; Roseman,  
87 2001; Hennet, 2002) found throughout the cells, tissues, and fluids of all lower  
88 mammals (Apostolovic et al., 2014; Galili & Avila, 1999; Hilger et al., 2016; Iweala et al.,  
89 2020; Takahashi et al., 2014).

90 Our earlier combinatorial approach using N-glycome and proteome identified the  $\alpha$ -gal  
91 antigen in salivary gland extracts and saliva of *Am. americanum* and *Ix. scapularis*  
92 (Crispell et al., 2019). When ticks feed on humans, they inject saliva, which delivers  
93 antigens containing  $\alpha$ -gal epitopes triggering the production of anti- $\alpha$ -Gal antibodies  
94 (Anti-Gal) (Commins and Platts-Mills 2013). Thus, tick salivary antigens appear to be  
95 critical in the development of AGS (Crispell et al., 2019; Choudhary et al., 2021).  
96 Mysteriously, the enzyme  $\alpha$ 1,3GalT, which synthesizes  $\alpha$ -gal, remains unidentified in  
97 tick genomes. New studies have shown indirect evidence that *Anaplasma*  
98 *phagocytophilum* infection in *Ixodes scapularis* cell culture induces an increase in  
99 expression of three other galactosyltransferases associated with increased levels of  $\alpha$ -  
100 gal glycans (Cabezas-Cruz et al., 2018). However, the exact mechanism of  $\alpha$ -gal  
101 biosynthesis in a tick is yet to be understood and, equally, the exact mechanism of how  
102 a tick bite sensitizes humans and leads to AGS development is yet to be clarified.  
103 During prolonged tick attachment on the host, the tick secretes and delivers a plethora  
104 of salivary proteins possibly containing  $\alpha$ -gal-antigens to the host skin that might trigger  
105 an  $\alpha$ -gal-directed IgE response (Araujo et al., 2016; Crispell et al., 2019; Choudhary et  
106 al., 2021). Surprisingly, continued exposure to ticks seems to augment the already  
107 existing IgE antibody response. However, it remains a challenge to understand why the  
108 response is so strong and directed so consistently against the  $\alpha$ -gal carbohydrate  
109 residue. In this study, we characterized the functional role of  $\alpha$ -D-galactosidase (ADGal)  
110 and  $\beta$ -1,4-galactosyltransferase ( $\beta$ -1,4-GalT) in galactose metabolism of *Am.*

111 *americanum*.  $\alpha$ -D-galactosidase (glycoside hydrolase/ADGal) catalyzes the breakdown  
112 of galactose from glycoproteins or glycolipids and  $\beta$ -1,4-galactosyltransferase ( $\beta$ -1,4-  
113 GalT) is involved in the synthesis of Gal $\beta$ 1-4-GlcNac-disaccharide unit of  
114 glycoconjugates. Both enzymes are expressed during tick feeding progression and we  
115 reveal the impact of each in overall  $\alpha$ -gal expression.

116

## 117 **Materials and Methods**

### 118 **Ethics statement**

119 All animal experiments were performed in strict accordance with the recommendations  
120 in the Guide for the Care and Use of Laboratory Animals of the National Institutes of  
121 Health, USA. The protocol for tick blood-feeding on sheep was approved by the  
122 Institutional Animal Care and Use Committee (IACUC) of the University of Southern  
123 Mississippi (protocol #15101501.2). All steps were taken to alleviate animal suffering.

### 124 **Materials**

125 All common laboratory supplies and chemicals were procured through Bio-Rad  
126 (Hercules, CA, USA), Sigma-Aldrich (St. Louis, MO, USA), and Fisher Scientific (Grand  
127 Island, NY, USA) unless specifically noted.

### 128 **Ticks and other animals**

129 Adult unfed lone-star ticks (*Amblyomma americanum*) were purchased from Oklahoma  
130 State University's tick rearing facility (Stillwater, OK, USA) and maintained at the  
131 University of Southern Mississippi following an established protocol (Patrick & Hair,  
132 1975). Adult ticks were kept at room temperature at approximately 90% humidity with a  
133 photoperiod of 14 hours of light and 10 hours of darkness prior to infestation on sheep.  
134 The adult ticks were fed on sheep for time intervals between 1 and 11 days for tissue  
135 collection, depending on the experimental plan.

### 136 **DsRNA Synthesis & Tick Injections.**

137 The gene of interest was amplified using PCR with gene-specific primers and purified  
138 using the QIAquick PCR Purification Kit (QIAGEN, Germany). Gene-specific T7  
139 promoter sequences were added to the 5' and 3' end of the purified product using PCR

140 and were purified. The purified T7 PCR products were confirmed by sequencing and  
141 transcribed into dsRNA using the T7 Quick High Yield RNA Synthesis Kit (New England  
142 Biolabs, Ipswich, MA). The dsRNA produced was purified via ethanol precipitation, and  
143 the concentration was measured using a Nanodrop spectrophotometer and was  
144 analyzed on a 2% Agarose gel. Unfed females were injected with 500ng of the purified  
145 dsRNA using a 31-gauge needle and were maintained at 37°C with 90% humidity for 24  
146 hrs. The ticks were then fed on sheep. The ticks were removed at different time points  
147 to determine the expression (Bullard et al., 2016).

#### 148 **Tick tissue dissection and salivary gland extract**

149 Partially fed female ticks removed from the sheep were dissected, and the salivary  
150 glands and midguts were removed and cleaned in ice-cold M199 buffer. Salivary glands  
151 and midguts from each time point were pooled together according to tissue type and  
152 stored in RNeasy (Life Technologies, Carlsbad NM) at -80°C until used (Bullard et al.,  
153 2016; 2019). Tick salivary protein was extracted from partially blood-fed female *Am.*  
154 *americanum* following the method described previously (Crispell et al., 2019). The  
155 salivary protein extracts were stored immediately at -80°C until subsequent western  
156 blot analysis.

#### 157 **RNA isolation and cDNA synthesis**

158 Frozen tick tissues were placed on ice to thaw and followed by careful removal of  
159 RNeasy. RNA was isolated from the time point pooled salivary glands using Illustra  
160 RNeasy Mini kit (GE Healthcare Lifesciences) protocols. RNA concentration was  
161 measured using a Nanodrop spectrophotometer and stored at -80°C or used  
162 immediately. Two µg of RNA was reverse transcribed using the iScript cDNA synthesis  
163 kit (Bio-Rad) to synthesize cDNA. The reverse transcription reaction is then heated in a  
164 Bio-Rad thermocycler under the following conditions: 5 minutes at 25°C, 30 minutes at  
165 42°C, 5 minutes at 85°C, and hold at 10°C. The resultant cDNA was diluted to a working  
166 concentration of 25 ng/µl with nuclease-free water and stored at -20°C until used  
167 (Bullard et al., 2016).

#### 168 **Quantitative Real-Time PCR**

169 QRT-PCR was performed within the guidelines of Bio-Rad protocols provided with iTaq  
170 Universal SYBR Green Supermix. Briefly, 50 ng of cDNA was added to a 20 µl qRT-  
171 PCR reaction using SYBR Green supermix with 300 nM of each gene-specific primer.  
172 The samples were subjected to the following thermocycling conditions: 95°C for 30 sec;  
173 35 cycles of 95°C for 5 sec and 60°C for 30 sec with a fluorescence reading after each  
174 cycle; followed by a melt curve from 65°C to 95°C in 0.5°C increments. Each reaction  
175 was performed in triplicate along with no template controls (Bullard et al., 2016).  
176 Primers used for gene expression validation can be found in Supplementary Table 1.  
177 Gene expression validation was performed using β-actin and histone as the reference  
178 gene.

### 179 **Quantification of total bacterial load**

180 The total bacterial load in tick tissues was determined using the method described  
181 elsewhere (Budachetri and Karim 2015; Narasimhan et al., 2014). Briefly, 25 µl volume  
182 reaction mixture contained 25 ng of tissue cDNA, 200 µM 16S RNA gene primer, and  
183 iTaq Universal SYBR Green Supermix (Bio-Rad) followed by a qPCR assay using  
184 following conditions: 94 °C for 5 min followed by 35 cycles at 94°C for the 30s, 60°C for  
185 30s and 72°C for 30s. A standard curve was used to determine the copy number of  
186 each gene. The bacterial copy number was normalized against *Am. americanum* actin  
187 copy number in control tissues and gene silenced tick, and each sample was run in  
188 triplicate.

### 189 **SDS-PAGE and Immunoblotting**

190 SDS-Polyacrylamide Gel Electrophoresis and Immunoblotting were carried out using  
191 the methods described elsewhere (Crispell et al., 2019). Proteins extracted from the  
192 salivary glands (15 µg) were fractionated on a Mini-PROTEAN TGX Any kD, 4–20% gel  
193 (Bio-Rad) using SDS-PAGE. They were then transferred onto a nitrocellulose  
194 membrane in a Transblot cell (Bio-Rad). The transfer buffer consisted of 25 mM Tris-  
195 HCl and 192 mM glycine in 20% methanol. Blocking of nonspecific protein binding sites  
196 was executed with 5% BSA in a TBS and Tween-20 solution. The membranes were  
197 incubated with α-galactose (M86) monoclonal IgM antibodies (Enzo Life Sciences,  
198 Farmingdale, NY, USA) at a dilution of 1:10 using an iBind western device (Life

199 Technologies, Camarillo, CA, USA). The antigen-antibody complexes were visualized  
200 using a secondary horseradish peroxidase-conjugated goat anti-mouse IgM antibody  
201 (Sigma-Aldrich) at a dilution of 1:10,000. They were detected with SuperSignal  
202 chemiluminescent substrate (Pierce Biotechnology, Rockford, IL, USA) using a Bio-Rad  
203 ChemiDox XRS.

#### 204 **Basophil Activation Assay with Tick Salivary glands**

205 Peripheral blood mononuclear cells (PBMCs) taken from a healthy, non- $\alpha$ -gal allergic  
206 donor ( $\alpha$ -gal sIgE <0.10) were isolated using a Ficoll–Paque gradient (GE Healthcare,  
207 Chicago, IL, USA). Endogenous IgE was stripped from basophils within the PBMC  
208 fraction by incubating the cells with cold lactic acid buffer (13.4 mM lactic acid, 140 mM  
209 NaCl, 5 mM KCl) for 15 min. Basophils were sensitized with plasma from  $\alpha$ -gal allergic  
210 and non-allergic subjects overnight in RPMI 1,640 cell culture media (Corning CellGro,  
211 Manassas, VA, USA) in the presence of IL-3 (1 ng/mL, R&D Systems, Minneapolis, MN,  
212 USA) at 37°C and 5% CO<sub>2</sub>. PBMCs were subsequently stimulated for 30 min with  
213 RPMI media, cetuximab (10  $\mu$ g), rabbit anti-human IgE (1  $\mu$ g; Bethyl Laboratories Inc.,  
214 Montgomery, TX, USA), partially fed salivary gland extracts from *Am. americanum* (50  
215  $\mu$ g). Stimulation reactions were stopped with 20 mM EDTA, and PBMCs stained with  
216 fluorescently labeled antibodies against CD123 (BioLegend, San Diego, CA, USA),  
217 human lineage 1 (CD3, CD14, CD16, CD19, CD20, CD56, BD Biosciences, San Jose,  
218 CA, USA), HLA-DR, CD63 (eBiosciences, ThermoFisher, Waltham, MA, USA), and  
219 CD203c (IOTest Beckman Coulter, Marseille, France) in flow cytometry staining buffer  
220 with 0.02% NaN<sub>3</sub>. Samples were acquired on a CyAN ADP flow cytometer (Beckman  
221 Coulter, Brea, CA, USA) and analyzed using FlowJo v10 software (FlowJo LLC,  
222 Ashland, OR, USA). Data analysis was performed using Prism version 7.03 (GraphPad  
223 Software, La Jolla, CA, USA). Mann–Whitney U-tests were used to compare the  
224 frequency of CD63+ basophils detected following stimulation with various compounds. A  
225 p-value < 0.05 was considered significant.

#### 226 **N-Glycome analysis of tick salivary glands**

227 N-linked glycans were released from 30  $\mu$ L of *Am. americanum* salivary glands with an  
228 estimated protein concentration of 200  $\mu$ g, after being reduced, alkylated, and then



229 digested with trypsin in Tris-HCl buffer overnight. After protease digestion, the sample  
230 was passed through a C18 seppak cartridge, washed with 5% v/v acetic acid, and the  
231 glycopeptides were eluted with a blend of isopropanol in 5% v/v acetic acid before being  
232 dried by SpeedVac. The dried glycopeptide eluate was treated with a combination of  
233 PNGase A (Sigma) and PNGase F (New England Biolabs, Ipswich, MA, USA) to  
234 release the N-linked glycans. The digest was then passed through a C18 sep pak  
235 cartridge to recover the N-glycans. The N-linked glycans were then permethylated for  
236 structural characterization by mass spectrometry. Briefly, the dried eluate was dissolved  
237 with dimethyl sulfoxide and methylated with NaOH and methyl iodide. The reaction was  
238 quenched with water, and per-O-methylated carbohydrates were extracted with  
239 methylene chloride and dried under N<sub>2</sub>. The permethylated glycans were reconstituted  
240 in 1:1 MeOH: H<sub>2</sub>O containing one mM NaOH, then introduced to the mass spectrometer  
241 (Thermo Fusion Tribrid Orbitrap) with direct infusion at a flow rate of 0.5  $\mu$ L/min. Full MS  
242 spectra and an automated "TopN" MS/MS program of the top 300 peaks were collected  
243 and fragmented with collision-induced fragmentation. These fragmentation data were  
244 used to confirm a Hex-Hex-HexNAc signature, both with a diagnostic fragment, as well  
245 as expected neutral losses.

## 246 **Results**

### 247 **Temporal expression of $\alpha$ -D-galactosidase and $\beta$ -1,4-galactosyltransferase in tick** 248 **salivary glands**

249 Temporal expression in *Am. americanum* salivary glands revealed the  $\alpha$ -D-  
250 galactosidase expression level increases ~2-fold after tick attachment to the host during  
251 the slow feeding phase up to five days post-infestation (dpi), and it decreased ~2-fold at  
252 seven dpi and ten dpi, during the rapid feeding phase (Figure 1A). Interestingly,  $\beta$ -1,4-  
253 galactosyltransferase transcript level increases ~8-fold after attachment at three dpi and  
254 remains upregulated (~2 fold at 5dpi; ~4.5 fold at seven dpi and ~2 fold at ten dpi)  
255 compared to the unfed salivary glands. Transcriptional expression was normalized  
256 against the unfed tick salivary gland.  $\beta$ -actin and histone, two housekeeping genes,  
257 were used to normalize the gene expression.

258 **Gene silencing and transcription expression of genes related to galactose**  
259 **metabolism**

260  $\alpha$ -D-galactosidase dsRNA injections led to ~65% and ~85 % downregulation of ADGal  
261 gene expression in both midguts and salivary glands (Figure 1B-1C), respectively.  
262 Transcriptional expression analysis of  $\alpha$ -D-galactosidase silenced tick tissues shows the  
263 significant downregulation of galectin (~50%), while a significant upregulation of  $\beta$ -  
264 tubulin in the midgut (~2-fold increase) and salivary gland tissues (~2.5-fold increase).  
265 In the salivary glands, a significant downregulation of  $\beta$ -1,4-GalT of approximately 2-fold  
266 and GALT by approximately 2-fold, and a non-significant decrease in galactokinase  
267 (GALK) were noted. In addition to that, there was upregulation of STT3A gene in ADGal  
268 silenced midgut (~1.6-fold increase) and salivary gland (~0.5-fold increase); however,  
269 this change was not statistically significant. Furthermore, there was non-significant  
270 downregulation of  $\beta$ -1,4-GT, GALT in ADGal silenced midgut tissues.

271 **Impact of  $\alpha$ -D-galactosidase silencing on Bacterial load**

272 Total bacterial load quantification assay showed that ~7-fold reduced 16S bacterial load  
273 in the salivary gland tissues of *Am. americanum* ticks that received dsADGal injections,  
274 compared to dsGFP irrelevant control injected ticks (Figure 1D).

275

276 **Impact of gene silencing on feeding success and tick engorgement**

277 To investigate the impact of silencing of  $\alpha$ -galactosidase and  $\beta$ -1,4-  
278 galactosyltransferase on the tick phenotype, we measured and compared engorged tick  
279 weight. Ticks treated with dsADGal engorged faster and weighed more than ticks  
280 injected with dsGFP irrelevant control (Figure 2). The dsAGS tick weights were  
281 significantly ( $P < 0.05$ ) increased at ten dpi compared with dsGFP control ticks. However,  
282 there was no significant difference in tick engorgement in  $\beta$ -1,4-galactosyltransferase  
283 gene silenced ticks.

284 **Alpha-gal expression in gene silenced tissues**

285 Salivary glands from five dpi, seven dpi, and nine dpi *Am. americanum* ticks injected  
286 with dsADGAL and dsGFP irrelevant control RNA were assessed using immunoblotting

287 with an anti- $\alpha$ -gal IgM antibody (Figure 3). Densitometry analysis was conducted to  
288 determine the relative abundance of  $\alpha$ -gal in dsADGal injected tick protein against  
289 dsGFP control protein (Supplementary figure 3). Results indicate an ~80% reduction in  
290  $\alpha$ -gal in dsADGal salivary gland proteins compared to the dsGFP control. A decrease in  
291  $\alpha$ -gal of more than 30% in the seven dpi dsADGal injected tick salivary glands, but the  
292 nine dpi salivary glands contained ~10% more  $\alpha$ -gal than the dsGFP irrelevant control.  
293 While there was no significant difference in  $\alpha$ -gal ds  $\beta$ -1, 4-GT injected *Am. americanum*  
294 ticks salivary gland in comparison to control (Supplementary figure 2B).

### 295 **Silencing of $\alpha$ -D-galactosidase reduces $\alpha$ -gal containing cross-reactive** 296 **carbohydrate determinants (CCDs) in tick salivary glands**

297 We performed N-glycan analysis to check the impact of  $\alpha$ -D-galactosidase silencing on  
298 the abundance of  $\alpha$ -gal containing glycoforms in tick salivary glands. Profile analysis of  
299 N-glycan from control samples and dsADGal showed a variety of high mannose,  
300 complex type, fucosylated, and alpha-gal containing glycoforms (Table 1,  
301 Supplementary figure 3-4; Supplementary tables 1-3) which were similar in overall  
302 trends to the N-glycan profile published previously (Crispell et al., 2019). In addition, the  
303 overall  $\alpha$ -gal glycoforms abundance profile showed that, in both samples, the  
304 abundance of fucosylated glycoforms was higher than non-fucosylated glycoforms  
305 (Supplementary tables: 1-3; Supplementary figures: 3-4). More specifically, overall N-  
306 glycans abundance containing  $\alpha$ -gal glycoforms or moieties in dsGFP injected control  
307 tick salivary gland was 24.02%; however, in the dsADGal treated salivary glands,  
308 overall N-glycans containing  $\alpha$ -gal moieties were significantly reduced to 2.81%. Among  
309 these data, the  $\alpha$ -gal having glycoforms at m/z of 2478 and 2723 were absent in the  
310 dsADGal treated salivary glands while other glycoforms m/z 2652 and 2897 compared  
311 to control (Table 1, Supplementary tables: 1-3). These results strengthen the hypothesis  
312 that tick  $\alpha$ -D-galactosidase is vital in synthesizing or transfer of  $\alpha$ -gal to tick salivary  
313 glycoproteins.

### 314 **Basophil Activation Test with tick salivary gland samples**

315 Since the profile of N-glycan demonstrates the presence of  $\alpha$ -gal antigen in salivary  
316 samples, we sought to analyze the impact of ADGal silencing in basophil activation. In

317 this basophil activation test, the frequency of CD63+-activated donor basophils is lower  
318 when PBMCs are stimulated with ADGal silenced five dpi *Am. americanum* salivary  
319 gland protein extract in comparison to control five dpi *Am. americanum* salivary glands,  
320 cetuximab, and Anti-IgE positive control (Figure 4). More specifically, we found that the  
321 frequency of CD63+ basophils was significantly increased following sensitization with  $\alpha$ -  
322 gal allergic plasma and stimulation with  $\alpha$ -gal-containing tick salivary extract samples  
323 from *Am. americanum* (PF SG extract) ( $p < 0.05$  vs. media, 4).

324 Furthermore, ADGal silenced salivary extract five dpi samples from *Am. americanum*  
325 showed a significantly lower frequency of CD63+ basophil (2.16%) activation. In  
326 contrast, the frequency of CD63+ activated basophils following stimulation with partially  
327 fed five dpi salivary extract was 9.51% when the results of all experiments (n=3) were  
328 combined. Overall, these results suggest a correlation between tick ADGal depletion  
329 and potential reduction in the host allergic immune response.

330

## 331 **Discussion**

332 The discovery of  $\alpha$ -gal immunoglobulin E (IgE), a central player involved in allergic  
333 responses against food containing  $\alpha$ -gal antigen such as red meat, and in people with a  
334 history of tick bite has caught enormous attention among immunologists and vector  
335 biologists (Commins, 2020; Crispell et al., 2019; van Nunen 2009; Sharma and Karim,  
336 2021). Several research reports have established that antigen-containing  $\alpha$ -gal is a key  
337 trigger for AGS development (Commins, 2020). Current research focuses on identifying  
338 and profiling  $\alpha$ -gal antigens in tick saliva and tissues to decipher the interplay between a  
339 tick bite and AGS (Sharma and Karim, 2021; Crispell et al., 2019; Cabezas-Cruz et al.,  
340 2019). It is still puzzling how the tick acquires and decorates its saliva antigens with  $\alpha$ -  
341 gal and primes the host immune response. The expression of  $\alpha$ -gal antigen in tick saliva  
342 is established in different ticks, including *Am. americanum*. However, answer to the  
343 questions relating to origin or source of  $\alpha$ -gal in a tick and the key mechanistic details of  
344 how bite from this tick leads to sensitization of humans against red meat allergy either  
345 by triggering the development of memory cell capable of producing  $\alpha$ -gal IgE or class  
346 switching of IgE because of salivary factor is yet to be clarified. Several pieces of

347 evidence support that the presentation of cross-reactive carbohydrates determinants or  
348 the  $\alpha$ -gal antigen by ticks during tick feeding is possibly the prime factor for sensitization  
349 of humans against  $\alpha$ -gal (Choudhary et al., 2021; Crispell et al., 2019). However, how  
350 ticks acquire or produce  $\alpha$ -gal moiety during feeding remains a complete mystery  
351 (Hamsten et al., 2013; Arujo et al., 2016). There are few working hypotheses regarding  
352 the source of  $\alpha$ -gal in a tick; (a)  $\alpha$ -gal present in a tick is residual or enzymatically  
353 modified/ cleaved mammalian  $\alpha$ -gal containing glycoprotein or glycolipids derived from  
354 the mammalian host, (b)  $\alpha$ -gal is originating from tick hosted microbes (tick microbiome)  
355 capable of expressing  $\alpha$ -gal in or possessing the capability to capture cleaved  
356 galactose oligosaccharide and glycosylate their own or tick salivary proteins (Sharma  
357 and Karim 2021).

358 Recently, we have demonstrated (Crispell et al., 2019; Choudhary et al., 2021; Sharma  
359 and Karim 2021): 1) tick bites, specifically by the lone star tick, might be solely  
360 responsible for stimulating an IgE response to  $\alpha$ -gal within the southern and eastern  
361 United States. 2) N-linked glycan analysis confirmed the presence of  $\alpha$ -gal in the saliva  
362 and salivary glands of *Amblyomma americanum* and *Ixodes scapularis*, but  
363 *Amblyomma maculatum* contained no detectable quantity. 3) An immuno-proteome  
364 approach confirmed the cross-reactivity between tick saliva proteins (allergens) to  $\alpha$ -gal  
365 antibodies. 4) The presence of antigenic galactose- $\alpha$ -1, 3-galactose ( $\alpha$ -gal) epitope  
366 activated human basophils as measured by increased expression of CD63. 5) The lone  
367 star tick salivary gland extracts induced AGS in  $\alpha$ -Gal<sup>-KO</sup> mice. An immunoproteome and  
368 sialotranscriptome analysis identified several expressed molecules during feeding  
369 progression linked with galactose metabolism, N-glycan synthesis, galactoside transport  
370 (Crispell et al., 2019; Karim and Ribeiro 2015). Surprisingly, the key enzyme,  $\alpha$ -1,3-  
371 galactosyltransferase ( $\alpha$ 1,3GalT), synthesized  $\alpha$ -gal, remains unidentified in tick  
372 genomes and transcriptomes. However, this enzyme is reported to be the key enzyme  
373 involved in the synthesis of  $\alpha$ 1,3-galactose ( $\alpha$ -1,3Gal or  $\alpha$ -gal) epitopes in several  
374 organisms (Galili, 1999; 2005; 2015).

375 We investigated the role of differentially expressed tick molecules during prolonged  
376 blood-feeding on the host, i.e.,  $\alpha$ -D-galactosidase (glycoside hydrolase/ADGal); an  
377 enzyme that catalyzes the breakdown of galactose from glycoproteins or glycolipids,

378 and  $\beta$ -1,4-galactosyltransferase ( $\beta$ -1,4-GalT); an enzyme that is involved in the  
379 synthesis of Gal $\beta$ 1-4-GlcNac-disaccharide unit of glycoconjugates (Hennet, 2002;  
380 Calhoun et al., 1986). We hypothesized that the expression of these genes during  
381 prolonged feeding and can impact on overall  $\alpha$ -gal expression, expression of key genes  
382 of galactose catabolism (Leloir pathway), N-glycan synthesis, galectin (a molecule  
383 involved in transport of galactose containing oligosaccharides) (Diaz and Ortega, 2017;  
384 Huang et al., 2007), and  $\beta$ -tubulin (a glycosylated marker molecule). Leloir pathway  
385 (Supplementary figure 1) is the predominant route of galactose metabolism and  
386 products of this pathway generate key energy molecules as substrate, i.e., UDP-  
387 galactose vital for N-glycan synthesis (Freeze et al., 2017; Karim and Ribeiro, 2015).  
388 More specifically, selected key molecules of the Leloir pathway included in this study  
389 were galactokinase (GALK), galactose-1-phosphate uridylyltransferase (GALT). GALK  
390 modifies galactose to create a molecule called galactose-1-phosphate, which can be  
391 further added to build galactose-containing proteins or fats (McAuley et al., 2016).  
392 Whereas GALT catalyzes the second step of the Leloir pathway (Supplementary figure  
393 1), converting galactose into glucose (Wong & Frey, 1974). In addition to that, another  
394 molecule, AamSigP-24522 putative dolichyl-diphosphooligosaccharide protein  
395 glycosyltransferase (STT3A), which is reported to be involved in early stage of  
396 cotranslational N-glycosylation of target protein (Cherepanova & Gilmore, 2016), was  
397 also included in the study to check the impact of silencing of ADGal and  $\beta$ -1,4-GalT in  
398 the initial step of N-glycosylation.

399 Furthermore, in this study, the impact of ADGal and  $\beta$ -1, 4-GalT silencing on  
400 glycosylated molecule and molecule involved in transport, the expression of  $\beta$ -tubulin  
401 and galectin was tested. In addition to that, in this study, we analyzed the expression of  
402  $\alpha$ -gal antigen in salivary glands of *Am. americanum* across the different feeding stages,  
403 we observed that  $\alpha$ -gal antigens in partially blood-fed are significantly up-regulated (3-5  
404 days) and gradually down-regulated as feeding transitions towards the fast feeding  
405 stage and repletion. Such concurring trend of differential expression of ADGal and  $\alpha$ -gal  
406 antigen expression in a tick salivary gland across feeding stages points towards the role  
407 of sialome-switch in tick's  $\alpha$ -gal signature (Karim and Ribeiro 2015). However, the  
408 central question regarding tick's inherent ability to express  $\alpha$ -gal remains enigmatic

409 because of the lack of  $\alpha$ -1,3 galactosyltransferase sequence in tick databases. To date,  
410 there are 1,776 genomes from vertebrates available at the NCBI genome site  
411 (<https://www.ncbi.nlm.nih.gov/genome/?term=vertebrata>) and 2,513 arthropod  
412 genomes, 11 of which are from ticks. Likewise, the silencing of the ADGal gene in both  
413 midgut and salivary gland tissues showed an interesting compensatory expression  
414 pattern of genes involved in galactose metabolism (Supplementary fig. 1). The transcript  
415 levels of  $\beta$ -1, 4-galactosyltransferase, galactose-1-phosphate uridylyltransferase (GALT),  
416 and galactose binding transport protein galectin were significantly down-regulated;  
417 while, the transcript level of  $\beta$ -tubulin was significantly upregulated. GALK, GALT, and  
418 galectin downregulation may be negative feedback responses due to the reduction of  
419 galactose-containing oligosaccharides caused by silencing of ADGal. While putative  
420 dolichyl-diphosphooligosaccharide protein glycosyltransferase subunit STT3A gene was  
421 up-regulated, upregulation was not statistically significant, probably due to  
422 compensatory effect from the redundant molecule. Since the temporal expression  
423 pattern of  $\beta$ -1, 4-GalT coincided with  $\alpha$ -gal antigen expression, we also carried out a  
424 functional study using RNAi.

425 Regardless of significant silencing of  $\beta$ -1,4-GT gene in salivary gland tissues, the  
426 transcript level of ADGal, GALK, GALT, STT3A, Galectin,  $\beta$ -tubulin as well as  $\alpha$ -gal-  
427 expression in *Am. americanum* showed no significant change. These results suggest  $\beta$ -  
428 1, 4-GalT does not contribute to the  $\alpha$ -gal signature in *Am. americanum*. Intriguingly,  
429 three variants of galactosyltransferase genes, i.e.,  $\beta$ 4galt-7;  $\alpha$ 4galt-1, and  $\alpha$ 4galt-2 from  
430  $\beta$ -1, 4-GalT, and  $\alpha$ -1, 4-GalT family are shown to be involved in the  $\alpha$ -gal synthesis  
431 pathway (Cabezas-Cruz et al., 2018). However, search for *Ix. scapularis* homologs in  
432 *Am. americanum* failed to yield any CDS in the existing NCBI transcriptomic database.  
433 Since the genome sequence of *Am., americanum* is not available so far. Hence, it will  
434 be challenging to conclude the absence of such important genes.

435 Since ADGal is an enzyme responsible for releasing  $\alpha$ -gal from substrates, it is  
436 differentially expressed across the feeding stages, indicating tick may be utilizing it for  
437 removing  $\alpha$ -gal from host-derived glycosylated lipid or proteins. To answer the question  
438 that  $\alpha$ -D-galactosidase plays a critical role in galactose metabolism and  $\alpha$ -gal signature  
439 in the tick tissues. We silenced the ADGal gene and performed N-Glycan analysis. The

440 results indicated a significant reduction in the overall abundance of N-glycans  
441 containing  $\alpha$ -gal glycoforms in tick samples. Basophil activation test using control and  
442 ADGal Salivary Gland Extract (SGE) showed a significant reduction in the frequency of  
443 activated basophil compared to control. These results further confirmed the N-Glycan  
444 analysis in the gene-silenced salivary glands. The engorgement weights of dsADGal  
445 ticks compared to control ticks showed a significant difference, and gene-silenced ticks  
446 gained weight faster than control ticks. This phenotype could result from the tick's  
447 compensatory mechanisms to losing a key galactose metabolizing molecule. The  
448 transcriptional expression data suggest the silencing of ADGal inhibits the tick's Leloir  
449 galactose metabolism pathway by downregulating the expression of intermediate  
450 enzymes, GALK and GALT, and correlates with differential expression of other  
451 galactose-modifying genes including,  $\beta$ 1-4, galactosyltransferase, galectin. The Leloir  
452 pathway ultimately channels into glycolysis and produces ATP. The ATP was not  
453 quantified in these experiments. Still, the downregulation of Leloir pathway genes and  
454 decrease in  $\alpha$ -gal may have led to the tick producing less energy and compensating it  
455 by imbibing high-quantity of blood meal (Raven & Johnson, 1995). Our findings support  
456 the functional role of ADGal in the tick's energy utilization.

457 A 6-fold decreased total bacterial loading in ADGal silenced partially-blood fed tick  
458 tissues supports the hypothesis that free galactose or glucose reduces the total  
459 bacterial load within the ticks. These results also support the functional role of ADGal in  
460 maintaining microbial homeostasis within the tick salivary glands. These findings further  
461 warrant investigations to examine the role of bacterial communities in AGS because of  
462 their possible role in manipulating ticks' metabolic activity and glycosylation machinery.  
463 Microbiome homeostasis within the tick is critical in the context of the  $\alpha$ -gal syndrome  
464 (AGS). Galactose is vital for microbes not only as an energy molecule but also as a key  
465 molecule required to produce glycosylated exopolysaccharides or lipopolysaccharides  
466 (LPS), a potential  $\alpha$ -gal antigen (Chai et al., 2012). In addition, the presence of specific  
467 microbes in the tick vector can also affect metabolome, especially galactose. One  
468 recent study of tick- *Borrelia* interaction found that relative abundance of galactose was  
469 significantly reduced in *Borrelia burgdorferi* and *Borrelia mayonni* infected ticks  
470 (Hoxmeier et al., 2017). Likewise, an earlier report on the role of galactose and Leloir



471 pathway genes, especially galactosyltransferase, established that galactose and  
472 bacterial galactosyl transferases are vital in biofilm formation for colonization of bacteria  
473 (Chai et al., 2012). Hamadeh et al. (1996) demonstrated glycosylation of human  
474 erythrocytes (RBCs) *in vivo* by a bacterial  $\alpha$ 1,3 galactosyl transferase enzyme. Another  
475 recent study demonstrated that the tick-borne  
476 pathogen *Anaplasma phagocytophilum* increases  $\alpha$ -gal antigen in IRE *Ix. ricinus* tick  
477 cells (Cabezas-Cruz et al., 2016). Montassier et al. (2019) reported the presence of  
478  $\alpha$ 1,3-galactosyltransferase bacterial sequences in the human gut microbiome shotgun  
479 sequencing project (Montassier et al., 2019). The microbes from  
480 Rizobiaceae and Caulobacteriaceae families were found to possess a novel lipid A a-  
481 (1,1)-GalA transferase gene(rgtF) (Brown et al., 2013). These findings provided a  
482 supporting basis for the hypothesis that a glycosylated lipid could be one augmenting  
483 factor for sensitization. Bacteria utilize this machinery to synthesize exogenous  
484 lipopolysaccharides (LPS), hence lipid A a-(1,1)-GalA transferase, which could be  
485 necessary for an  $\alpha$ -gal antigen development (Brown et al., 2013; Del Moral & Martínez-  
486 Naves, 2017). Considering all these facts, it is inferred that the microbiome could also  
487 be one factor involved in the sensitization against  $\alpha$ -gal while the tick is feeding on the  
488 host.

## 489 **Conclusion**

490 The results from multiple research papers have led to the conclusion that the (a) tick  $\alpha$ -  
491 D-galactosidase is an important enzyme that is uniquely expressed in salivary glands,  
492 and tick utilizes this enzyme to cleave  $\alpha$ -gal from host proteins or lipids and recycle or  
493 add in its proteins during hematophagy (b)  $\alpha$ -D-galactosidase silencing reduces N  
494 glycan signature ( $\alpha$ -gal moieties) in the tick salivary glands, (c)  $\beta$ -1,4-  
495 galactosyltransferase downregulates galactose catabolism however silencing in a tick  
496 does not affect overall  $\alpha$ -gal expression, (d)  $\alpha$ -D-galactosidase silencing also  
497 significantly reduces the microbial load in tick salivary glands. Overall,  $\alpha$ -D-  
498 galactosidase is an essential enzyme involved in the development of  $\alpha$ -gal antigen in  
499 ticks during hematophagy. The results presented here add new insights into  
500 understanding the role of vital tick intrinsic factors involved in the synthesis or recycling  
501 of  $\alpha$ -gal and sensitize host against  $\alpha$ -gal during hematophagy.

502

## 503 **Ethics Statement**

504 All animal experiments were conducted in strict accordance with the recommendations  
505 in the Guide for the Care and Use of Laboratory Animals of the National Institutes of  
506 Health, USA. The protocol for tick blood-feeding on sheep was approved by the  
507 Institutional Animal Care and Use Committee of the University of Southern Mississippi.

508

## 509 **Author Contributions**

510 Conceptualization: Shahid Karim  
511 Methodology: Surendra Raj Sharma, Gary Crispell, Ahmed Mohamed, Cameron Cox,  
512 Joshua Lange, Shailesh Chaudhary, Scott Commins, Shahid Karim  
513 Data curation: Surendra Raj Sharma, Gary Crispell, Shailesh Chaudhary, Scott  
514 Commins, Shahid Karim  
515 Funding acquisition: Scott P. Commins, Shahid Karim  
516 Investigation: Surendra Sharma, Gary Crispell, Shailesh Chaudhary, Scott Commins,  
517 Shahid Karim  
518 Project administration: Shahid Karim  
519 Resources: Scott Commins, Shahid Karim  
520 Supervision; Shahid Karim  
521 Validation: Surendra Raj Sharma, Scott Commins, Shahid Karim  
522 Writing, original draft: Surendra Raj Sharma, Gary Crispell, Shahid Karim  
523 Writing, review & editing: Surendra Sharma, Scott Commins, Shahid Karim  
524 All authors read and approved the manuscript.

## 525 **Funding**

526 This research was principally supported by USDA NIFA award # 2017-67017-26171,  
527 the National Institutes of Allergy and Infectious Diseases award, RO1 AI35049; the  
528 Mississippi INBRE (an institutional Award (IDeA) from the National Institute of General  
529 Medical Sciences of the National Institutes of Health under award P20GM103476). The  
530 funders played no role in the study design, data collection and analysis, decision to  
531 publish, or preparation of the manuscript.

## 532 **Conflict of Interest Statement**

533 The authors declare that the research was conducted in the absence of any commercial  
534 or financial relationships that could be construed as a potential conflict of interest.

535

536 **References**

- 537 Aalberse, R. C., Koshte, V., & Clemens, J. G. J. (1981). Immunoglobulin E antibodies  
538 that crossreact with vegetable foods, pollen, and Hymenoptera venom. *The Journal*  
539 *of Allergy and Clinical Immunology*, 68(5), 356–364. doi.org/10.1016/0091-  
540 6749(81)90133-0
- 541 Adegoke, A., Kumar, D., Bobo, C., Rashid, M. I., Durrani, A. Z., Sajid, M. S., & Karim, S.  
542 (2020). Tick-borne pathogens shape the native microbiome within tick vectors.  
543 *Microorganisms*, 8(9), 1–16. doi.org/10.3390/microorganisms8091299
- 544 Apostolovic, D., Tran, T. A. T., Hamsten, C., Starkhammar, M., Cirkovic Velickovic, T., &  
545 van Hage, M. (2014). Immunoproteomics of processed beef proteins reveal novel  
546 galactose- $\alpha$ -1,3-galactose-containing allergens. *Allergy*, 69(10), 1308–1315.  
547 doi.org/10.1111/all.12462
- 548 Araujo, R. N., Franco, P. F., Rodrigues, H., Santos, L. C. B., McKay, C. S., Sanhueza,  
549 C. A., Brito, C. R. N., Azevedo, M. A., Venuto, A. P., Cowan, P. J., Almeida, I. C.,  
550 Finn, M. G., & Marques, A. F. (2016). *Amblyomma sculptum* tick saliva:  $\alpha$ -Gal  
551 identification, antibody response and possible association with red meat allergy in  
552 Brazil. *International Journal for Parasitology*, 46(3), 213–220.  
553 doi.org/10.1016/j.ijpara.2015.12.005
- 554 Berg, E. A., Platts-Mills, T. A. E., & Commins, S. P. (2014). Drug allergens and food -  
555 The cetuximab and galactose- $\alpha$ -1,3-galactose story. *Annals of Allergy, Asthma and*  
556 *Immunology*, 112(2), 97–101. [doi.org/10.1016/j.anai.2013.11.014](https://doi.org/10.1016/j.anai.2013.11.014)
- 557 Binder, A. M., Commins, S. P., Altrich, M. L., Wachs, T., Biggerstaff, B. J., Beard, C. B.,  
558 Petersen, L. R., Kersh, G. J., & Armstrong, P. A. (2021). Diagnostic testing for  
559 galactose- $\alpha$ -1,3-galactose, United States, 2010 to 2018. *Annals of Allergy, Asthma & Immunology* : official publication of the American College of Allergy,  
560 *Asthma, & Immunology*, 126(4), 411–416. doi.org/10.1016/j.anai.2020.12.019
- 561 Brown, D. B., Muszynski, A., & Carlson, R. W. (2013). Elucidation of a novel lipid A  $\alpha$ -  
562 (1,1)-GalA transferase gene (*rgtF*) from *Mesorhizobium loti*: Heterologous  
563 expression of *rgtF* causes *Rhizobium etli* to synthesize lipid A with  $\alpha$ -(1,1)-GalA.  
564 *Glycobiology*, 23(5), 546–558. [doi.org/10.1093/glycob/cws223](https://doi.org/10.1093/glycob/cws223)
- 565 Budachetri, K., & Karim, S. (2015). An insight into the functional role of thioredoxin  
566 reductase, a selenoprotein, in maintaining normal native microbiota in the Gulf  
567 Coast tick (*Amblyomma maculatum*). *Insect molecular biology*, 24(5), 570–581.  
568 <https://doi.org/10.1111/imb.12184>
- 569 Bullard, R. L., Williams, J., & Karim, S. (2016). Temporal gene expression analysis and  
570 RNA silencing of single and multiple members of gene family in the lone star tick  
571 *Amblyomma americanum*. *PLoS ONE*, 11(2), 827–834.  
572 doi.org/10.1371/journal.pone.0147966
- 573 Bullard, R., Sharma, S. R., Das, P. K., Morgan, S. E., & Karim, S. (2019). Repurposing  
574 of Glycine-Rich Proteins in Abiotic and Biotic Stresses in the Lone-Star Tick  
575 (*Amblyomma americanum*). *Frontiers in Physiology*, 10, 744.  
576 doi.org/10.3389/fphys.2019.00744
- 577 Cabezas-Cruz, A., Espinosa, P. J., Alberdi, P., Šimo, L., Valdés, J. J., Mateos-  
578 Hernández, L., Contreras, M., Rayo, M. V., & de la Fuente, J. (2018). Tick  
579 galactosyltransferases are involved in  $\alpha$ -Gal synthesis and play a role during  
580 *Anaplasma phagocytophilum* infection and *Ixodes scapularis* tick vector  
581

- 582 development. *Scientific Reports*, 8(1), 14224. doi.org/10.1038/s41598-018-32664-z
- 583 Cabezas-Cruz, A., Hodžić, A., Román-Carrasco, P., Mateos-Hernández, L., Duscher,
- 584 G. G., Sinha, D. K., Hemmer, W., Swoboda, I., Estrada-Peña, A., & De La Fuente,
- 585 J. (2019). Environmental and molecular drivers of the  $\alpha$ -Gal syndrome. In *Frontiers*
- 586 *in Immunology* (Vol. 10, Issue MAY, p. 1210). Frontiers Media S.A.
- 587 doi.org/10.3389/fimmu.2019.01210
- 588 Calhoun, D. H., Bishop, D. F., Bernstein, H. S., Quinn, M., Hantzopoulos, P., & Desnick,
- 589 R. J. (1985). Fabry disease: Isolation of a cDNA clone encoding human  $\alpha$ -
- 590 galactosidase A. *Proceedings of the National Academy of Sciences of the United*
- 591 *States of America*, 82(21), 7364–7368. doi.org/10.1073/pnas.82.21.7364
- 592 Chai, Y., Beauregard, P. B., Vlamakis, H., Losick, R., & Kolter, R. (2012). Galactose
- 593 metabolism plays a crucial role in biofilm formation by *Bacillus subtilis*. *MBio*, 3(4).
- 594 [doi.org/10.1128/mBio.00184-12](https://doi.org/10.1128/mBio.00184-12)
- 595 Choudhary, S. K., Karim, S., Iweala, O. I., Choudhary, S., Crispell, G., Sharma, S. R.,
- 596 Addison, C. T., Kulis, M., Herrin, B. H., Little, S. E., & Commins, S. P. (2021). Tick
- 597 salivary gland extract induces alpha-gal syndrome in alpha-gal deficient
- 598 mice. *Immunity, inflammation and disease*, 9(3), 984–990. doi.org/10.1002/iid3.457
- 599 Cherepanova, N. A., & Gilmore, R. (2016). Mammalian cells lacking either the
- 600 cotranslational or posttranslocational oligosaccharyltransferase complex display
- 601 substrate-dependent defects in asparagine linked glycosylation. *Scientific Reports*,
- 602 6(1), 1–12. doi.org/10.1038/srep20946
- 603 Childs, J. E., & Paddock, C. D. (2003). The Ascendancy of *Amblyomma americanum* as
- 604 a Vector of Pathogens Affecting Humans in The United States. In *Annual Review of*
- 605 *Entomology* (Vol. 48, pp. 307–337).
- 606 doi.org/10.1146/annurev.ento.48.091801.112728
- 607 Chinuki, Y., Ishiwata, K., Yamaji, K., Takahashi, H., Morita, E. (2016). *Haemaphysalis*
- 608 *Longicornis* Tick Bites Are a Possible Cause of Red Meat Allergy in
- 609 Japan. *Allergy*, 71 (3), 421–425. doi: 10.1111/all.12804
- 610 Commins, S. P. (2020). Diagnosis & management of alpha-gal syndrome: lessons from
- 611 2,500 patients. In *Expert Review of Clinical Immunology* (pp. 1–11).
- 612 doi.org/10.1080/1744666X.2020.1782745
- 613 Commins, S. P., James, H. R., Kelly, L. A., Pochan, S. L., Workman, L. J., Perzanowski,
- 614 M. S., Kocan, K. M., Fahy, J. V., Nganga, L. W., Ronmark, E., Cooper, P. J., &
- 615 Platts-Mills, T. A. E. (2011). The relevance of tick bites to the production of IgE
- 616 antibodies to the mammalian oligosaccharide galactose- $\alpha$ -1,3-galactose. *Journal of*
- 617 *Allergy and Clinical Immunology*, 127(5), 1286-1293.e6.
- 618 doi.org/10.1016/j.jaci.2011.02.019
- 619 Commins, S. P., & Platts-Mills, T. A. E. (2013). Delayed anaphylaxis to red meat in
- 620 patients with ige specific for galactose alpha-1,3-galactose (alpha-gal). *Current*
- 621 *Allergy and Asthma Reports*, 13(1), 72–77. doi.org/10.1007/s11882-012-0315-y
- 622 Crispell, G., Commins, S. P., Archer-Hartman, S. A., Choudhary, S., Dharmarajan, G.,
- 623 Azadi, P., & Karim, S. (2019). Discovery of alpha-gal-containing antigens in North
- 624 American tick species believed to induce red meat allergy. *Frontiers in*
- 625 *Immunology*, 10(MAY). doi.org/10.3389/fimmu.2019.01056
- 626 Díaz-Alvarez, L., & Ortega, E. (2017). The Many Roles of Galectin-3, a Multifaceted
- 627 Molecule, in Innate Immune Responses against Pathogens. In *Mediators of*

- 628 *Inflammation* (Vol. 2017).. [doi.org/10.1155/2017/9247574](https://doi.org/10.1155/2017/9247574)
- 629 Freeze HH, Hart GW, Schnaar RL. Glycosylation Precursors. 2017. In: Varki A,  
630 Cummings RD, Esko JD, et al., editors. *Essentials of Glycobiology*. 3rd edition.  
631 Cold Spring Harbor (NY): Cold Spring Harbor Laboratory Press; 2015-2017.  
632 Chapter 5. Available from: <https://www.ncbi.nlm.nih.gov/books/NBK453043/> doi:  
633 10.1101/glycobiology.3e.005
- 634 Galili, U. (2005). The  $\alpha$ -gal epitope and the anti-Gal antibody in xenotransplantation and  
635 in cancer immunotherapy. In *Immunology and Cell Biology* (Vol. 83, Issue 6, pp.  
636 674–686). [doi.org/10.1111/j.1440-1711.2005.01366.x](https://doi.org/10.1111/j.1440-1711.2005.01366.x)
- 637 Galili, U. (2015). Significance of the Evolutionary  $\alpha$ 1,3-Galactosyltransferase (GGTA1)  
638 Gene Inactivation in Preventing Extinction of Apes and Old World Monkeys. *Journal*  
639 *of Molecular Evolution*, 80(1), 1–9. [doi.org/10.1007/s00239-014-9652-x](https://doi.org/10.1007/s00239-014-9652-x)
- 640 Galili, U., & Avila, J. L. (Eds.). (1999).  $\alpha$ -Gal and Anti-Gal,  $\alpha$ 1,3-Galactosyltransferase,  
641  $\alpha$ -Gal Epitopes, and the Natural Anti-Gal Antibody Subcellular Biochemistry Vol. 32  
642 (Boston, MA: Springer US). doi: 10.1007/978-1-4615-4771-6
- 643 Goddard, J., & Varela-Stokes, A. S. (2009). Role of the lone star tick, *Amblyomma*  
644 *americanum* (L.), in human and animal diseases. In *Veterinary Parasitology* (Vol.  
645 160, Issues 1–2, pp. 1–12). [doi.org/10.1016/j.vetpar.2008.10.089](https://doi.org/10.1016/j.vetpar.2008.10.089)
- 646 Del Moral, M. G., & Martínez-Naves, E. (2017). The Role of Lipids in Development of  
647 Allergic Responses. *Immune network*, 17(3), 133–143.  
648 [doi.org/10.4110/in.2017.17.3.133](https://doi.org/10.4110/in.2017.17.3.133)
- 649 Hamadeh, R. M., Galili, U., Zhou, P., & Griffiss, J. M. (1995). Anti- $\alpha$ -galactosyl  
650 immunoglobulin A (IgA), IgG, and IgM in human secretions. *Clinical and Diagnostic*  
651 *Laboratory Immunology*, 2(2), 125–131. [doi.org/10.1128/cdli.2.2.125-131.1995](https://doi.org/10.1128/cdli.2.2.125-131.1995)
- 652 Hamsten, C., Tran, T. A. T., Starkhammar, M., Brauner, A., Commins, S. P., Platts-  
653 Mills, T. A. E., & van Hage, M. (2013a). Red meat allergy in Sweden: Association  
654 with tick sensitization and B-negative blood groups. *Journal of Allergy and Clinical*  
655 *Immunology*, 132(6), 1431-1434.e6. [doi.org/10.1016/j.jaci.2013.07.050](https://doi.org/10.1016/j.jaci.2013.07.050)
- 656 Hamsten, C., Starkhammar, M., Tran, T. A. T., Johansson, M., Bengtsson, U., Ahlén,  
657 G., et al. (2013). Identification of Galactose- $\alpha$ -1,3-Galactose in the Gastrointestinal  
658 Tract of the Tick *Ixodes Ricinus*; Possible Relationship With Red Meat  
659 Allergy. *Allergy*, 68 (4), 549–552. doi: 10.1111/all.12128
- 660 Hennet, T. (2002). The galactosyltransferase family. In *Cellular and Molecular Life*  
661 *Sciences* (Vol. 59, Issue 7, pp. 1081–1095). Springer. [doi.org/10.1007/s00018-002-](https://doi.org/10.1007/s00018-002-8489-4)  
662 [8489-4](https://doi.org/10.1007/s00018-002-8489-4)
- 663 Hilger, C., Fischer, J., Swiontek, K., Hentges, F., Lehnert, C., Eberlein, B., Morisset, M.,  
664 Biedermann, T., & Ollert, M. (2016). Two galactose- $\alpha$ -1,3-galactose carrying  
665 peptidases from pork kidney mediate anaphylactogenic responses in delayed meat  
666 allergy. *Allergy: European Journal of Allergy and Clinical Immunology*, 71(5), 711–  
667 719. [doi.org/10.1111/all.12835](https://doi.org/10.1111/all.12835)
- 668 Hoxmeier, J. C., Fleshman, A. C., Broeckling, C. D., Prenni, J. E., Dolan, M. C., Gage,  
669 K. L., & Eisen, L. (2017). Metabolomics of the tick-Borrelia interaction during the  
670 nymphal tick blood meal. *Scientific Reports*, 7. [doi.org/10.1038/srep44394](https://doi.org/10.1038/srep44394)
- 671 Huang, X., Tsuji, N., Miyoshi, T., Nakamura-Tsuruta, S., Hirabayashi, J., & Fujisaki, K.  
672 (2007). Molecular characterization and oligosaccharide-binding properties of a  
673 galectin from the argasid tick *Ornithodoros moubata*. *Glycobiology*, 17(3), 313–323.

- 674 [doi.org/10.1093/glycob/cwl070](https://doi.org/10.1093/glycob/cwl070)
- 675 Iweala, O. I., Choudhary, S. K., Addison, C. T., Batty, C. J., Kapita, C. M., Amelio, C.,  
676 Schuyler, A. J., Deng, S., Bachelder, E. M., Ainslie, K. M., Savage, P. B., Brennan,  
677 P. J., & Commins, S. P. (2020). Glycolipid-mediated basophil activation in alpha-gal  
678 allergy. *Journal of Allergy and Clinical Immunology*, *146*(2), 450–452.  
679 [doi.org/10.1016/j.jaci.2020.02.006](https://doi.org/10.1016/j.jaci.2020.02.006)
- 680 Karim, S., & Ribeiro, J. M. (2015). An Insight into the Sialome of the Lone Star Tick,  
681 *Amblyomma americanum*, with a Glimpse on Its Time Dependent Gene  
682 Expression. *PLoS one*, *10*(7), e0131292. [doi.org/10.1371/journal.pone.0131292](https://doi.org/10.1371/journal.pone.0131292)
- 683 McAuley, M., Kristiansson, H., Huang, M., Pey, A. L., & Timson, D. J. (2016).  
684 Galactokinase promiscuity: A question of flexibility? *Biochemical Society*  
685 *Transactions*, *44*(1), 116–122. [doi.org/10.1042/BST20150188](https://doi.org/10.1042/BST20150188)
- 686 Montassier, E., Al-Ghalith, G. A., Mathé, C., Le Bastard, Q., Douillard, V., Garnier, A.,  
687 Guimon, R., Raimondeau, B., Touchefeu, Y., Duchalais, E., Vince, N., Limou, S.,  
688 Gourraud, P.-A., Laplaud, D. A., Nicot, A. B., Soullillou, J.-P., & Berthelot, L. (2019).  
689 Distribution of Bacterial  $\alpha$ 1,3-Galactosyltransferase Genes in the Human Gut  
690 Microbiome. *Frontiers in Immunology*, *10*, 3000. [doi.org/10.3389/fimmu.2019.03000](https://doi.org/10.3389/fimmu.2019.03000)
- 691 Monzón, J. D., Atkinson, E. G., Henn, B. M., & Benach, J. L. (2016). Population and  
692 evolutionary genomics of *Amblyomma americanum*, an expanding arthropod  
693 disease vector. *Genome Biology and Evolution*, *8*(5), 1351–1360.  
694 [doi.org/10.1093/gbe/evw080](https://doi.org/10.1093/gbe/evw080)
- 695 Narasimhan, S., Rajeevan, N., Liu, L., Zhao, Y. O., Heisig, J., Pan, J., Eppler-Epstein,  
696 R., Deponte, K., Fish, D., & Fikrig, E. (2014). Gut microbiota of the tick vector  
697 *Ixodes scapularis* modulate colonization of the Lyme disease spirochete. *Cell Host*  
698 *and Microbe*, *15*(1), 58–71. [doi.org/10.1016/j.chom.2013.12.001](https://doi.org/10.1016/j.chom.2013.12.001)
- 699 Patrick, C. D., & Hair, J. A. (1975). Laboratory rearing procedures and equipment for  
700 multi-host ticks (Acarina: Ixodidae). *Journal of Medical Entomology*, *12*(3), 389–  
701 390.
- 702 Raghavan, R. K., Townsend Peterson, A., Cobos, M. E., Ganta, R., & Foley, D. (2019).  
703 Current and Future Distribution of the Lone Star Tick, *Amblyomma americanum* (L.)  
704 (Acari: Ixodidae) in North America. *PLoS ONE*, *14*(1).  
705 [doi.org/10.1371/journal.pone.0209082](https://doi.org/10.1371/journal.pone.0209082)
- 706 Raven, P. H., & Johnson, G. B. (1995). *Understanding biology 3rd ed.* WCB/McGraw-  
707 Hill.
- 708 Roseman, S. (2001). Reflections on Glycobiology. In *Journal of Biological Chemistry*  
709 (Vol. 276, Issue 45, pp. 41527–41542).. [doi.org/10.1074/jbc.R100053200](https://doi.org/10.1074/jbc.R100053200)
- 710 Sayler, K. A., Barbet, A. F., Chamberlain, C., Clapp, W. L., Alleman, R., Loeb, J. C.,  
711 Lednicky, J. A., & Kuhn, J. H. (2014). Isolation of tacaribe virus, a caribbean arenavirus,  
712 from host-seeking *Amblyomma americanum* ticks in Florida. *PLoS ONE*, *9*(12).  
713 [doi.org/10.1371/journal.pone.0115769](https://doi.org/10.1371/journal.pone.0115769)
- 714 Sharma SR, Karim S. Tick Saliva and the Alpha-Gal Syndrome: Finding a Needle in a  
715 Haystack. *Front. Cell. Infect. Microbiol.* *11*:680264. doi:10.3389/fcimb.2021.680264.
- 716 Sicherer, S. H., & Sampson, H. A. (2006). 9. Food allergy. *Journal of Allergy and*  
717 *Clinical Immunology*, *117*(2 SUPPL. 2). [doi.org/10.1016/j.jaci.2005.05.048](https://doi.org/10.1016/j.jaci.2005.05.048)
- 718 Sonenshine DE. (2018). Range expansion of tick disease vectors in North America:  
719 Implications for spread of tick-borne disease. *International Journal of Environmental*

720        *Research and Public health*, 15: 478. doi:10.3390/ijerph15030478  
721        Springer YP, Jarnevich CS, Barnett DT, Monaghan AJ, Eisen RJ. (2015). Modeling the  
722        present and future geographic distribution of the lone-star tick *Amblyomma*  
723        *americanum* (Ixodidae: Ixodida) in the continental United States. *Am. J. Trop. Med.*  
724        *Hyg*, 93(4):875-890.  
725        Takahashi, H., Chinuki, Y., Tanaka, A., & Morita, E. (2014). Laminin  $\gamma$ -1 and collagen  $\alpha$ -  
726        1 (VI) chain are galactose- $\alpha$ -1,3-galactose-bound allergens in beef. *Allergy:*  
727        *European Journal of Allergy and Clinical Immunology*, 69(2), 199–207.  
728        doi.org/10.1111/all.12302  
729        Van Nunen, S. A., O'Connor, K. S., Clarke, L. R., Boyle, R. X., & Fernando, S. L.  
730        (2009). An association between tick bite reactions and red meat allergy in humans.  
731        *Medical Journal of Australia*, 190(9), 510–511. doi.org/10.5694/j.1326-  
732        5377.2009.tb02533.x  
733        Wong, L. J., & Frey, P. A. (1974). Galactose-1-Phosphate Uridyltransferase. Rate  
734        Studies Confirming a Uridyl-Enzyme Intermediate on the Catalytic Pathway.  
735        *Biochemistry*, 13(19), 3889–3894. doi.org/10.1021/bi00716a011  
736        Wuerdeman, M. F., & Harrison, J. M. (2014). A case of tick-bite-induced red meat  
737        allergy. *Military Medicine*, 179(4), e473–e475. doi.org/10.7205/MILMED-D-13-  
738        00369  
739  
740  
741  
742

743

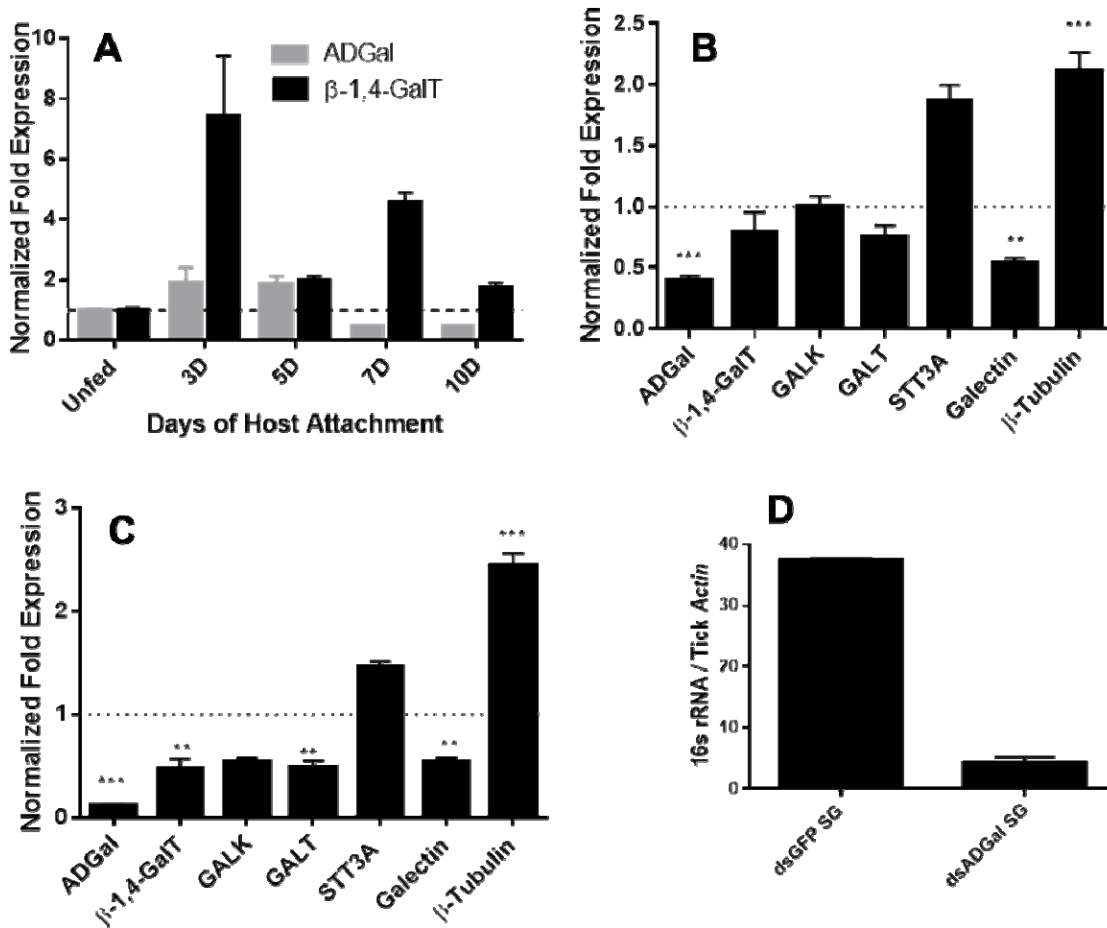

744

745

746

**Figure 1: Transcriptional expression in tick tissues.**

747 **A)** time-dependent transcriptional gene expression of  $\alpha$ -D-galactosidase (ADGal) and  $\beta$ -

748 1,4 galactosyltransferase( $\beta$ - 1,4-GalT) in *Amblyomma americanum* salivary glands. Fold

749 changes were normalized with the unfed tissue expression. B-actin and histone were

750 used to normalize the gene expression. **B)** Transcriptional expression of carbohydrate

751 metabolism and transport-related genes in  $\alpha$ -D-galactosidase silenced partially blood-

752 fed midguts and, **C)** salivary glands. B-actin and histone, house-keeping genes were

753 used to normalize the expression against dsGFP treated tissues. Abbreviations:  $\beta$ - 1,4-

754 GalT ( $\beta$ -1,4 galactosyltransferase); GALK (Galactokinase); GALT

755 (galactosyltransferase); STT3A (Dolichyl-diphosphooligosaccharide-protein

756 glycosyltransferase)(\*P<0.005; \*\*P<0.01,\*\*\*P<0.001, student t-test), **D)** Total bacterial

757 load partially blood-fed salivary glands injected with dsGFP and dsADGal. Total

758 bacterial load was quantified by qPCR using  $\beta$ -actin as a reference gene.

759

760

761

762

763



764

765

766

767

768

769

770

771

772

773

774

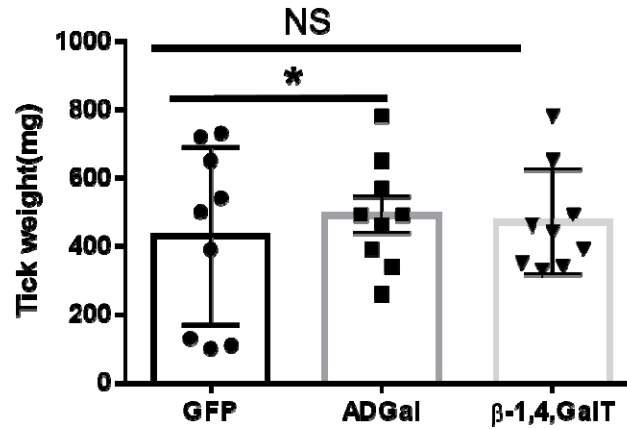

775

776

777 **Figure 2** Engorgement weights of ticks treated with dsRNA, tick weights were taken  
778 from mass replete or forcibly removed ticks at four time-points during the bloodmeal  
779 after treatment with dsADGal ( $\alpha$ -galactosidase), ds $\beta$ -1,4-GT( $\beta$ -1,4  
780 galactosyltransferase) or dsGFP (irrelevant control) double-stranded RNA (\* P<0.05,  
781 students t-test )

782

783

784

785

786

787

788

789

790

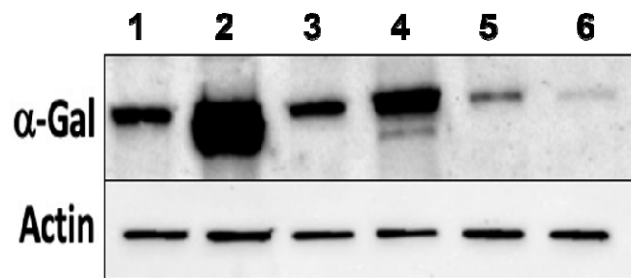

791

792

793 **Figure 3** Western blot analysis of  $\alpha$ -gal using anti-gal IgM in dsADGal ( $\alpha$ -galactosidase)

794 and dsGFP(irrelevant control) injected partially-fed *Am. americanum* salivary glands.

795 Lane 1, 5days post infestation (dpi.) dsADGal salivary glands; Lane 2, 5dpi dsGFP

796 salivary glands; Lane 3. 7dpi dsADGal salivary glands; Lane 4. 7dpi dsGFP salivary

797 glands; Lane 5. 9dpi dsADGal salivary glands; Lane 6, 9dpi dsGFP salivary glands

798

799

800 **Table 1:** N-Glycan analysis on 5dii *Am. americanum* salivary gland protein extracts.  
 801 The mass to charge ratio (m/z) signifies different  $\alpha$ -gal glycoforms. Total percentage  $\alpha$ -  
 802 gal indicates the percentage sum of different  $\alpha$ -gal glycoforms detected in SG-Control  
 803 dsGFP  
 804 or irrelevant control) treated and ds  $\alpha$ -galactosidase-treated (SG-ADGal KD). Greyed  
 805 out  
 806 Boxes indicate that this mass was not detected in that sample. Key: NO: MS/MS  
 807 fragmentation resulted in 486.23 ion  
 808  
 809

810  
811  
812  
813  
814  
815  
816  
817  
818  
819  
820  
821  
822  
823  
824  
825  
826  
827  
828

|                |       |       |      |       |       |       |       |       | TOTAL<br>%<br>Alpha-<br>Gal |
|----------------|-------|-------|------|-------|-------|-------|-------|-------|-----------------------------|
| m/z            | 1825  | 1999  | 2070 | 2244  | 2478  | 2652  | 2723  | 2897  |                             |
| SG-<br>Control |       | 0.25% | NO   | 0.00% | 2.10% | 8.94% | 4.43% | 8.30% | 24.02%                      |
| SG-KD          | 0.11% | 0.51% | NO   | 0.41% |       | 1.23% |       | 0.46% | 2.81%                       |

829 :  
830  
831

Legend:  
 Galactose  
 N-acetylglucosam  
 Mannose  
 Hexose

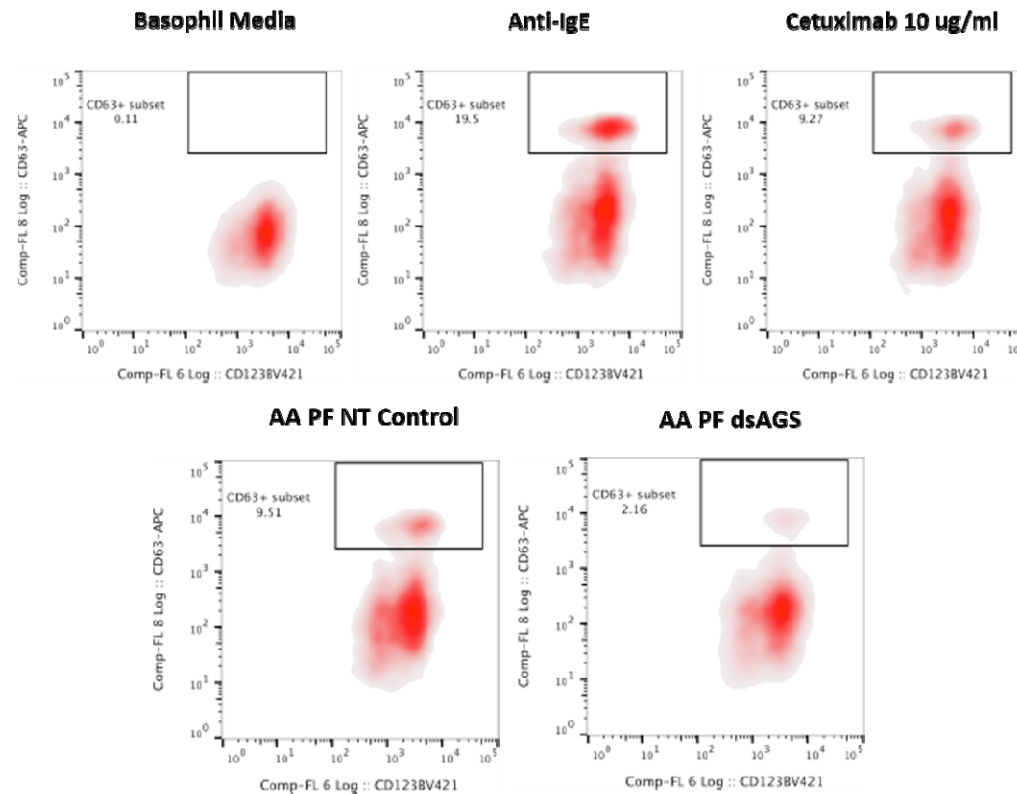

**Figure 4:**

Flow cytometric analysis of human basophil activation by *Amblyomma americanum* salivary proteins. Donor basophils from a healthy, non-allergic control subject were stripped of IgE and primed overnight with plasma from a subject with  $\alpha$ -gal syndrome ( $\alpha$ -gal sIgE = 31.3 IU/mL, total IgE = 233 IU/mL). Sensitized cells were exposed to one of the following stimuli for 30 min: RPMI media, crosslinking anti-IgE antibody (Positive control),  $\alpha$ -gal containing glycoprotein, cetuximab ( $\alpha$ -gal positive control), partially blood-fed *Am. americanum* control and  $\alpha$ -D-galactosidase gene silenced salivary gland extracts treated, CD63 expression on lineage-HLA-DR-CD123+CD203c+basophils were assessed by flow cytometry.

Table 1: List of genes, accession numbers, primers, and base sizes used in this study for transcriptional and gene silencing experiments.

| Gene                                                               | Accession      | Forward primer 5'-3'                                  | Reverse primer 5'-3'                                 | Size (bp) |
|--------------------------------------------------------------------|----------------|-------------------------------------------------------|------------------------------------------------------|-----------|
| Aa -Actin                                                          | EZ000248.1     | TGGTATCCTCACCCCTGAAGTA                                | ACGCAGCTCGTTGTAGAAG                                  | 100       |
| Aa $\beta$ -Tubulin                                                | GBZX01001418.1 | CACAGAAGCAGAGTCCAACA                                  | CCTCCTCTTCATCTCCAAACTC                               | 101       |
| Aa Histone H3                                                      | GI:759084459   | GAAGCCAGTGAGGCATACTT                                  | GCTGGATATCCTTTGGCATGA                                | 104       |
| AamerSigP-37433<br>$\alpha$ -D-galactosidase                       | N/A            | TCCGAACGACAACGAACTC                                   | CTTGTGAATGTAGTCCGCTAGG                               | 93        |
| Aam-23951<br>$\beta$ -1,4-N-acetylgalactosaminyl<br>transferase    | N/A            | TCCAGTGCTTCGTGTTCC                                    | TTTCTCGTGACGGACATGTG                                 | 100       |
| Aam SigP-33934<br>STT3A                                            | N/A            | AGACTCTATTCTTTGGGGCAGTGACT                            | GCAAGTCAAAGAAGAAGGAGAACCACG                          | 207       |
| Aam-4310<br>galactokinase                                          | N/A            | GCAAGAACACGAAACACCTG                                  | CAAATGTCCTTGAAGTCCAC                                 | 97        |
| Aam41143 GALTT, uridyl<br>(galactosyl transferase)                 | NA             | AAAGATGAATGGGTCCTCGTATC                               | CACTTCAGACTGGCTCATCAA                                | 100       |
| T7 AamerSigP-37433<br>$\alpha$ D-galactosidase                     | NA             | GTAATACGACTCACTATAGGGAGTTGGT<br>CTGTTTCTTGCTTTTC      | GTAATACGACTCACTATAGGGTACC<br>CATCTTCAACGAGGTGATCT    | 193       |
| T7 Aam-23951<br>$\beta$ -1,4-N-<br>acetylgalactosaminyltransferase | NA             | GTAATACGACTCACTATAGGGGAGTCA<br>GTGCCGTGAGTAAGGAG      | GTAATACGACTCACTATAGGG<br>TTCACCTCGGCTTGCTCTTGGC      | 188       |
| T7-GFP                                                             | NA             | GAATTAATACGACTCACTATAGGGAGA<br>GTCTTGTAGTTCCCGTCATCTT | GAATTAATACGACTCACTATA<br>GGGAGAAGCCAACACTTGTCACTACTT | 208       |

## Supplementary information

### Supplementary figure1 – Proposed galactose metabolism pathway of *Amblyomma americanum*.

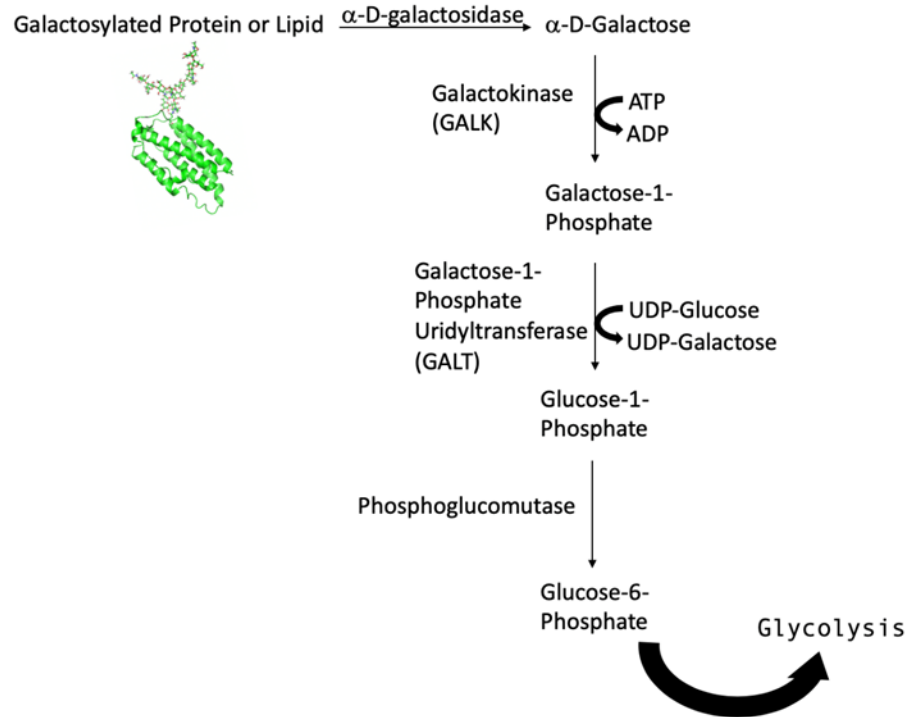

**Supplementary Table 1: Summary of potential  $\alpha$ -Gal Glycoforms Determined by MS/MS Analysis**

|                   |             |             |             |             |             |  |
|-------------------|-------------|-------------|-------------|-------------|-------------|--|
|                   |             |             |             |             |             |  |
| m/z               | <b>1825</b> | <b>1999</b> | <b>2029</b> | <b>2203</b> | <b>2070</b> |  |
| <b>SG-Control</b> |             | MIX         |             |             | NO          |  |
| <b>SG-KO</b>      | MIX         | MIX         |             |             | NO          |  |
|                   |             |             |             |             |             |  |
| m/z               | <b>2478</b> | <b>2652</b> | <b>2723</b> | <b>2897</b> |             |  |
| <b>SG-Control</b> | YES         | YES         | YES         | YES         |             |  |
| <b>SG-KO</b>      |             | YES         |             |             |             |  |

Greyed out boxes indicate that this mass was not detected in that sample.

“Unknown” = the MS/MS fragmentation was ambiguous,

“NO” = MS/MS fragmentation resulted in 486.23 ion

“YES” = MS/MS fragmentation resulted in 690.33 ion

YES/MIX” = MS/MS fragmentation resulted in both ions

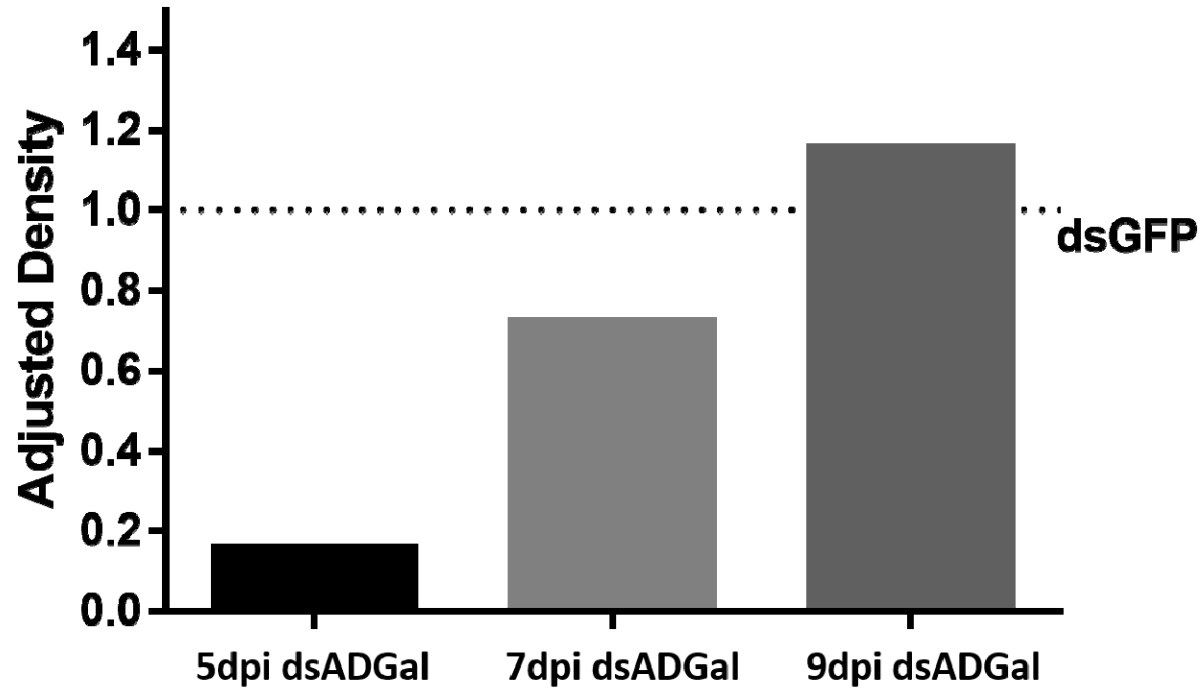

**Supplementary figure 2:** Quantification of relative abundance of  $\alpha$ -gal in dsADGal ( $\alpha$ -galactosidase) and dsGFP(irrelevant control) injected partially-fed *Am. americanum* salivary glands.



SK\_D999\_D09\_201812120396382136-22/3 R1: 8.63-9.10 AV: 82 NL: 1.32e8

F: FTMS + p NSI Full ms [800.0000-2000.0000]

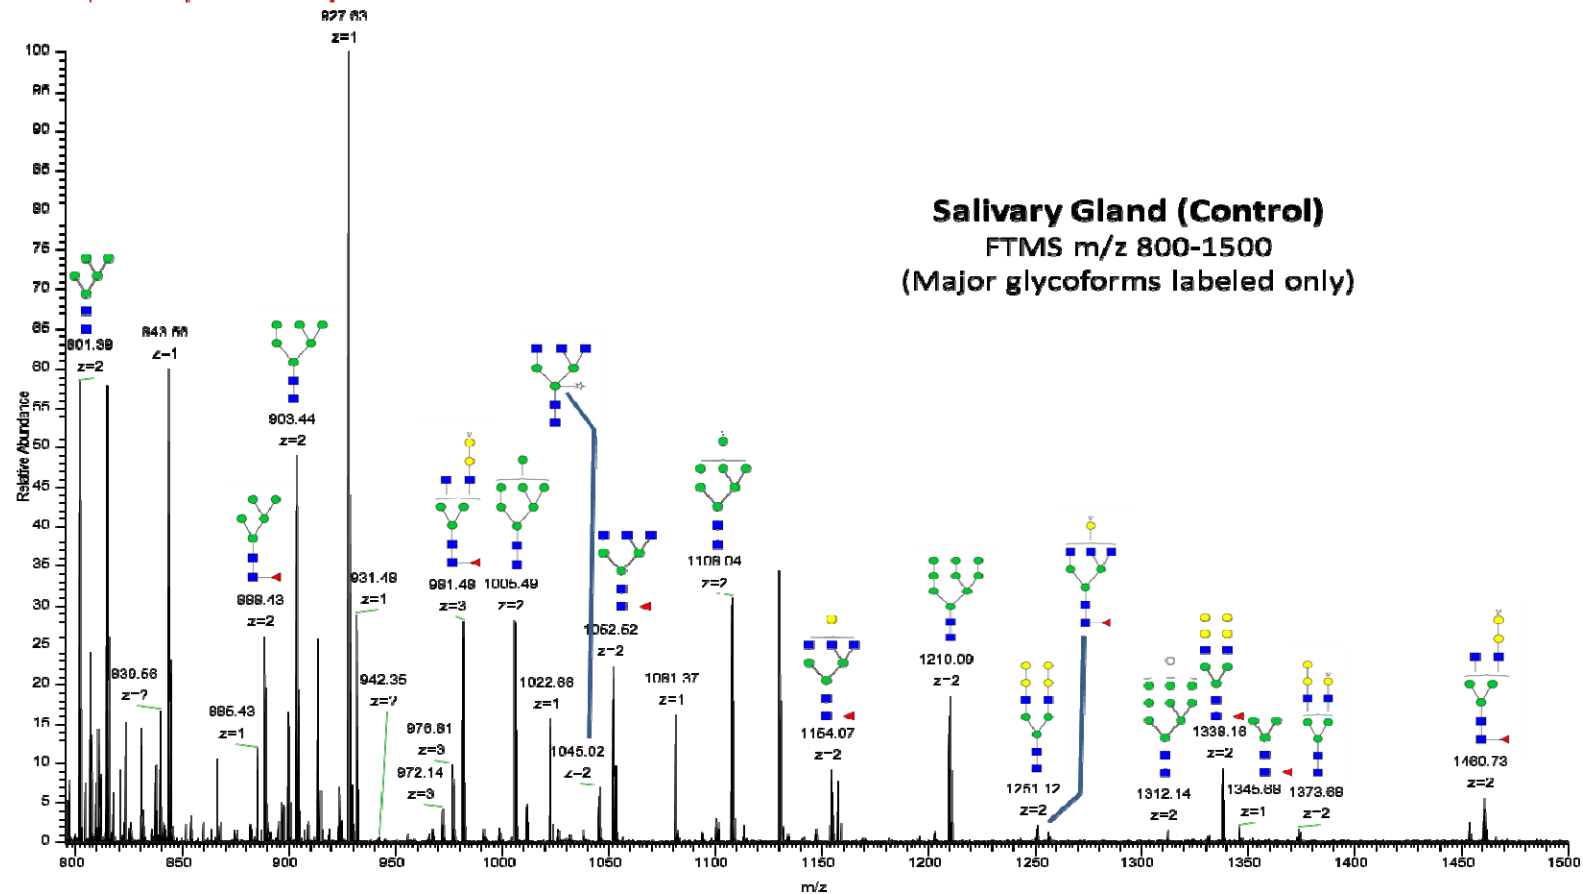

Supplementary figure 3: FTMS of N-glycans observed in control Salivary Gland

SK\_D6F6G\_DDS\_20181212041908379 771 RT: 2.38 2.78 AV: 69 NL: 1.13E9  
F: FTMS + p NSI Full ms [800.0000-2000.0000]

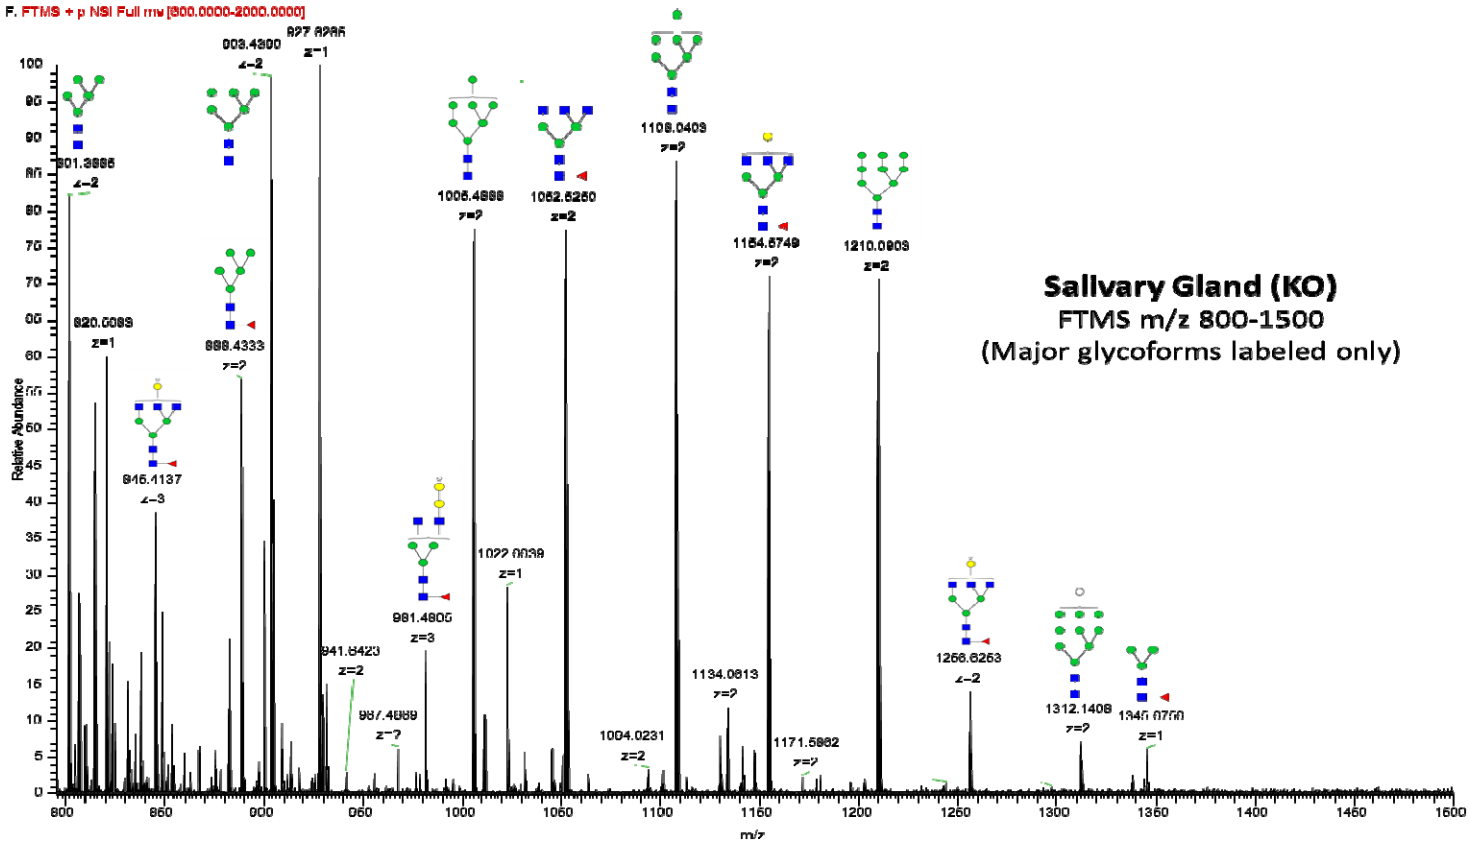

**Supplementar y figure 4:**  
FTMS of N-glycans observed in KO Salivary Gland

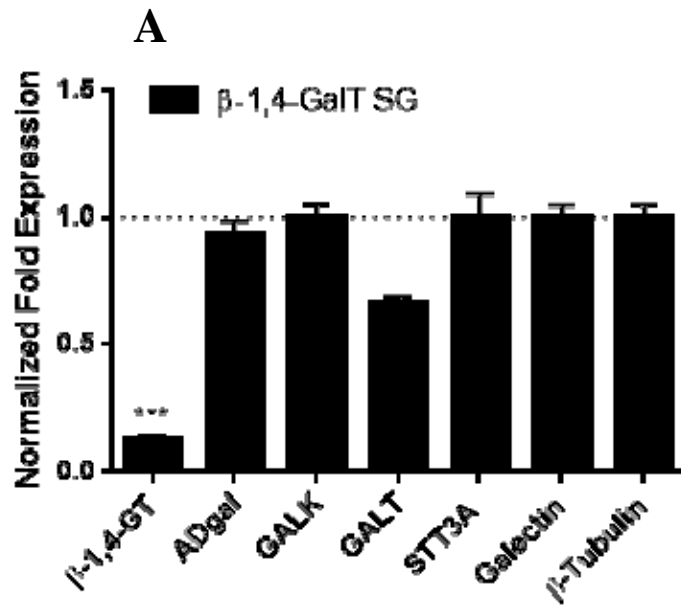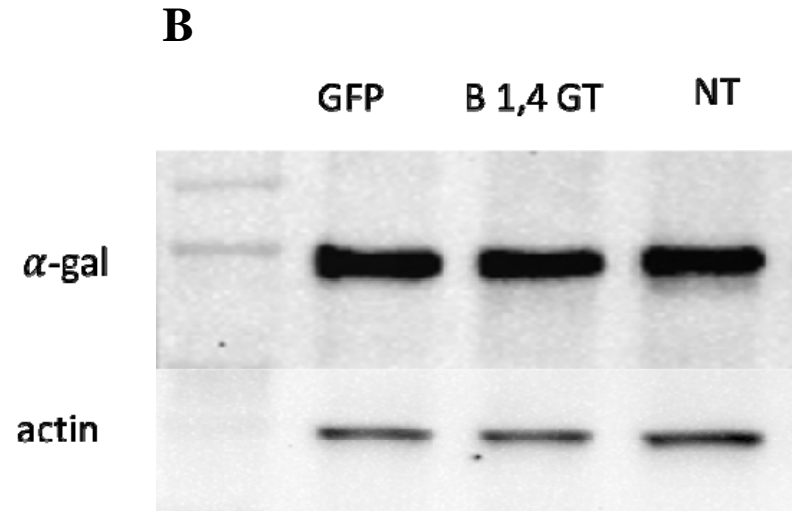

**Supplementary figure 5:** (A) Transcriptional expression of major galactose metabolism, N-glycan synthesis and transport related genes against  $\beta$ - 1,4 galactosyl transferase silencing in five day partially feed salivary gland(SG) of *Am. americanum*. Actin and Histone was used as house keeping gene and expression was normalized against irrelevant control (GFP dsRNA). Abbreviation: ADgal  $\alpha$ -D-galactosidase,  $\beta$ - 1,4 GT:  $\beta$ - 1,4 galactosyl transferase; GALK: Galacto kinase; GALT galactosyl transferase; STT3A: Dolichyl-diphosphooligosaccharide--protein glycosyltransferase (\*\*\*) $P < 0.001$ , student t test) (B) Detection of  $\alpha$ -gal in ds  $\beta$ -1,4GT, dsGFP and non treated injected partially-fed tick salivary glands



**Supplementary table 2:** FTMS of N-Glycans observed in control salivary glands.

| M+Na <sup>+</sup> | Δmass (Da) | Composition                                                                                                    | Proposed Structure                                                                    | Percentage (rel % intensity) |
|-------------------|------------|----------------------------------------------------------------------------------------------------------------|---------------------------------------------------------------------------------------|------------------------------|
| 1345.6702         | -0         | (Hex) <sub>3</sub> (HexNAc) <sub>2</sub> (Deoxyhexose) <sub>1</sub>                                            | 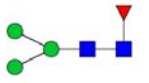   | 1.27%                        |
| 1579.7874         | 0.004      | (Hex) <sub>2</sub> + (Man) <sub>3</sub> (GlcNAc) <sub>2</sub>                                                  |    | 14.07%                       |
| 1590.8036         | 0.004      | (HexNAc) <sub>1</sub> (Deoxyhexose) <sub>1</sub> + (Man) <sub>3</sub> (GlcNAc) <sub>2</sub>                    |    | 4.78%                        |
| 1753.8774         | 0.005      | (Hex) <sub>2</sub> (Deoxyhexose) <sub>1</sub> + (Man) <sub>3</sub> (GlcNAc) <sub>2</sub>                       |    | 7.03%                        |
| 1783.8878         | 0.005      | (Hex) <sub>3</sub> + (Man) <sub>3</sub> (GlcNAc) <sub>2</sub>                                                  |    | 12.13%                       |
| 1794.9002         | 0.002      | (Hex) <sub>1</sub> (HexNAc) <sub>1</sub> (Deoxyhexose) <sub>1</sub> + (Man) <sub>3</sub> (GlcNAc) <sub>2</sub> |   | 0.00%                        |
| 1987.9888         | 0.006      | (Hex) <sub>4</sub> + (Man) <sub>3</sub> (GlcNAc) <sub>2</sub>                                                  |  | 7.73%                        |
| 1999.0046         | 0.006      | (Hex) <sub>2</sub> (HexNAc) <sub>1</sub> (Deoxyhexose) <sub>1</sub> + (Man) <sub>3</sub> (GlcNAc) <sub>2</sub> |  | 0.25%                        |

|           |       |                                                                                                                |                                                                                       |       |
|-----------|-------|----------------------------------------------------------------------------------------------------------------|---------------------------------------------------------------------------------------|-------|
|           |       |                                                                                                                | 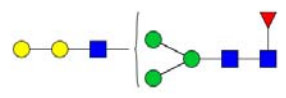   |       |
| 2040.0254 | 0     | (Hex) <sub>1</sub> (HexNAc) <sub>2</sub> (Deoxyhexose) <sub>1</sub> + (Man) <sub>3</sub> (GlcNAc) <sub>2</sub> |    | 0.00% |
| 2067.0416 | 0.005 | (HexNAc) <sub>3</sub> (Pent) <sub>1</sub> + (Man) <sub>3</sub> (GlcNAc) <sub>2</sub>                           |    | 1.89% |
| 2070.0444 | 0.009 | (Hex) <sub>2</sub> (HexNAc) <sub>2</sub> + (Man) <sub>3</sub> (GlcNAc) <sub>2</sub>                            |    | 0.28% |
| 2081.0572 | 0.006 | (HexNAc) <sub>3</sub> (Deoxyhexose) <sub>1</sub> + (Man) <sub>3</sub> (GlcNAc) <sub>2</sub>                    |    | 6.91% |
| 2192.0876 | 0.005 | (Hex) <sub>5</sub> + (Man) <sub>3</sub> (GlcNAc) <sub>2</sub>                                                  |    | 8.27% |
| 2244.1248 | 0     | (Hex) <sub>2</sub> (HexNAc) <sub>2</sub> (Deoxyhexose) <sub>1</sub> + (Man) <sub>3</sub> (GlcNAc) <sub>2</sub> |   | 0.00% |
| 2271.1448 | 0.009 | (Hex) <sub>1</sub> (HexNAc) <sub>3</sub> (Pent) <sub>1</sub> + (Man) <sub>3</sub> (GlcNAc) <sub>2</sub>        |  | 0.87% |

|           |       |                                                                                                                |                                                                                                                                         |       |
|-----------|-------|----------------------------------------------------------------------------------------------------------------|-----------------------------------------------------------------------------------------------------------------------------------------|-------|
| 2285.1566 | 0.005 | (Hex) <sub>1</sub> (HexNAc) <sub>3</sub> (Deoxyhexose) <sub>1</sub> + (Man) <sub>3</sub> (GlcNAc) <sub>2</sub> | 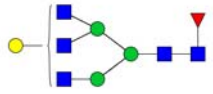                                                     | 4.59% |
| 2396.1884 | 0.006 | (Hex) <sub>6</sub> + (Man) <sub>3</sub> (GlcNAc) <sub>2</sub>                                                  |                                                      | 4.49% |
| 2478.245  | 0.009 | (Hex) <sub>4</sub> (HexNAc) <sub>2</sub> + (Man) <sub>3</sub> (GlcNAc) <sub>2</sub>                            |                                                      | 2.10% |
| 2489.2474 | -0    | (Hex) <sub>2</sub> (HexNAc) <sub>3</sub> (Deoxyhexose) <sub>1</sub> + (Man) <sub>3</sub> (GlcNAc) <sub>2</sub> |                                                      | 1.39% |
| 2600.289  | 0.007 | (Hex) <sub>7</sub> + (Man) <sub>3</sub> (GlcNAc) <sub>2</sub>                                                  |                                                      | 0.25% |
| 2652.3286 | 0.004 | (Hex) <sub>4</sub> (HexNAc) <sub>2</sub> (Deoxyhexose) <sub>1</sub> + (Man) <sub>3</sub> (GlcNAc) <sub>2</sub> |                                                      | 8.94% |
| 2693.3543 | 0.003 | (Hex) <sub>3</sub> (HexNAc) <sub>3</sub> (Deoxyhexose) <sub>1</sub> + (Man) <sub>3</sub> (GlcNAc) <sub>2</sub> |                                                     | 0.00% |
| 2723.3663 | 0.005 | (Hex) <sub>4</sub> (HexNAc) <sub>3</sub> + (Man) <sub>3</sub> (GlcNAc) <sub>2</sub>                            | <br>Multiple forms are possible for this structure | 4.43% |
| 2897.4492 | 0.013 | (Hex) <sub>4</sub> (HexNAc) <sub>3</sub> (Deoxyhexose) <sub>1</sub> + (Man) <sub>3</sub> (GlcNAc) <sub>2</sub> | <br>Multiple forms are possible for this           | 8.30% |

|  |  |  |           |  |
|--|--|--|-----------|--|
|  |  |  | structure |  |
|--|--|--|-----------|--|



**Supplementary Table 3:** FTMS of N-glycans observed in  $\alpha$ -D-galactosidase silenced salivary glands

| M+Na <sup>+</sup> | $\Delta$ mass (Da) | Composition                                                                                                    | Proposed Structure                                                                    | Percentage (rel % intensity) |
|-------------------|--------------------|----------------------------------------------------------------------------------------------------------------|---------------------------------------------------------------------------------------|------------------------------|
| 1141.575          | 0.003              | (Hex) <sub>2</sub> (HexNAc) <sub>2</sub> (Deoxyhexose) <sub>1</sub>                                            | 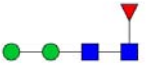   | 0.30%                        |
| 1345.676          | 0.003              | (Hex) <sub>3</sub> (HexNAc) <sub>2</sub> (Deoxyhexose) <sub>1</sub>                                            |    | 4.14%                        |
| 1375.687          | 0.003              | (Hex) <sub>4</sub> (HexNAc) <sub>2</sub>                                                                       |    | 2.83%                        |
| 1579.787          | 0.004              | (Hex) <sub>2</sub> + (Man) <sub>3</sub> (GlcNAc) <sub>2</sub>                                                  |    | 3.77%                        |
| 1590.803          | 0.004              | (HexNAc) <sub>1</sub> (Deoxyhexose) <sub>1</sub> + (Man) <sub>3</sub> (GlcNAc) <sub>2</sub>                    |    | 1.21%                        |
| 1620.814          | 0.005              | (Hex) <sub>1</sub> (HexNAc) <sub>1</sub> + (Man) <sub>3</sub> (GlcNAc) <sub>2</sub>                            |   | 0.04%                        |
| 1753.877          | 0.004              | (Hex) <sub>2</sub> (Deoxyhexose) <sub>1</sub> + (Man) <sub>3</sub> (GlcNAc) <sub>2</sub>                       |  | 2.64%                        |
| 1783.888          | 0.006              | (Hex) <sub>3</sub> + (Man) <sub>3</sub> (GlcNAc) <sub>2</sub>                                                  |  | 4.60%                        |
| 1794.904          | 0.005              | (Hex) <sub>1</sub> (HexNAc) <sub>1</sub> (Deoxyhexose) <sub>1</sub> + (Man) <sub>3</sub> (GlcNAc) <sub>2</sub> |  | 0.44%                        |

|          |       |                                                                                             |  |       |
|----------|-------|---------------------------------------------------------------------------------------------|--|-------|
| 1824.917 | 0.007 | $(\text{Hex})_2 (\text{HexNAc})_1 + (\text{Man})_3(\text{GlcNAc})_2$                        |  | 0.11% |
| 1987.984 | 0.005 | $(\text{Hex})_4 + (\text{Man})_3(\text{GlcNAc})_2$                                          |  | 3.62% |
| 1999.003 | 0.005 | $(\text{Hex})_2 (\text{HexNAc})_1 (\text{Deoxyhexose})_1 + (\text{Man})_3(\text{GlcNAc})_2$ |  | 0.51% |
| 2040.03  | 0.004 | $(\text{Hex})_1 (\text{HexNAc})_2 (\text{Deoxyhexose})_1 + (\text{Man})_3(\text{GlcNAc})_2$ |  | 0.28% |
| 2067.041 | 0.004 | $(\text{HexNAc})_3 (\text{Pent})_1 + (\text{Man})_3(\text{GlcNAc})_2$                       |  | 0.28% |
| 2070.043 | 0.007 | $(\text{Hex})_2 (\text{HexNAc})_2 + (\text{Man})_3(\text{GlcNAc})_2$                        |  | 0.09% |
| 2081.057 | 0.006 | $(\text{HexNAc})_3 (\text{Deoxyhexose})_1 + (\text{Man})_3(\text{GlcNAc})_2$                |  | 4.30% |
| 2192.088 | 0.005 | $(\text{Hex})_5 + (\text{Man})_3(\text{GlcNAc})_2$                                          |  | 5.02% |

|          |       |                                                                                                                |                                                                                       |       |
|----------|-------|----------------------------------------------------------------------------------------------------------------|---------------------------------------------------------------------------------------|-------|
| 2244.128 | 0.003 | (Hex) <sub>2</sub> (HexNAc) <sub>2</sub> (Deoxyhexose) <sub>1</sub> + (Man) <sub>3</sub> (GlcNAc) <sub>2</sub> | 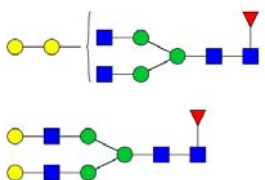   | 0.41% |
| 2271.141 | 0.006 | (Hex) <sub>1</sub> (HexNAc) <sub>3</sub> (Pent) <sub>1</sub> + (Man) <sub>3</sub> (GlcNAc) <sub>2</sub>        |    | 0.56% |
| 2285.157 | 0.005 | (Hex) <sub>1</sub> (HexNAc) <sub>3</sub> (Deoxyhexose) <sub>1</sub> + (Man) <sub>3</sub> (GlcNAc) <sub>2</sub> |    | 5.74% |
| 2396.187 | 0.004 | (Hex) <sub>6</sub> + (Man) <sub>3</sub> (GlcNAc) <sub>2</sub>                                                  |    | 4.95% |
| 2489.258 | 0.006 | (Hex) <sub>2</sub> (HexNAc) <sub>3</sub> (Deoxyhexose) <sub>1</sub> + (Man) <sub>3</sub> (GlcNAc) <sub>2</sub> |    | 1.58% |
| 2600.289 | 0.007 | (Hex) <sub>7</sub> + (Man) <sub>3</sub> (GlcNAc) <sub>2</sub>                                                  |   | 0.77% |
| 2652.329 | 0.004 | (Hex) <sub>4</sub> (HexNAc) <sub>2</sub> (Deoxyhexose) <sub>1</sub> + (Man) <sub>3</sub> (GlcNAc) <sub>2</sub> |  | 1.23% |
| 2693.355 | 0.003 | (Hex) <sub>3</sub> (HexNAc) <sub>3</sub> (Deoxyhexose) <sub>1</sub> + (Man) <sub>3</sub> (GlcNAc) <sub>2</sub> |  | 0.08% |
| 2734.389 | 0.012 | (Hex) <sub>2</sub> (HexNAc) <sub>4</sub> (Deoxyhexose) <sub>1</sub> + (Man) <sub>3</sub> (GlcNAc) <sub>2</sub> |  | 0.05% |

|          |       |                                                                                                                   |                                                                                                                                                                         |       |
|----------|-------|-------------------------------------------------------------------------------------------------------------------|-------------------------------------------------------------------------------------------------------------------------------------------------------------------------|-------|
| 2897.457 | 0.006 | (Hex) <sub>4</sub> (HexNAc) <sub>3</sub> (Deoxyhexose) <sub>1</sub> +<br>(Man) <sub>3</sub> (GlcNAc) <sub>2</sub> | 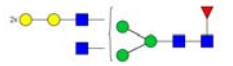 <p data-bbox="1165 284 1438 381">Multiple forms are possible for this structure</p> | 0.46% |
|----------|-------|-------------------------------------------------------------------------------------------------------------------|-------------------------------------------------------------------------------------------------------------------------------------------------------------------------|-------|

Miscellaneous supplementary figures: FTMS of all N-glycans observed in KO Salivary and control Gland

SK\_DSSG\_DDS\_20181212033539 #60-4696 RT: 2.25-13.62 AV: 5 NL: 1.12E5  
 F: FTMS +p NSI d Full ms2 981.1439@cid45.00 [265.0000-2000.0000]

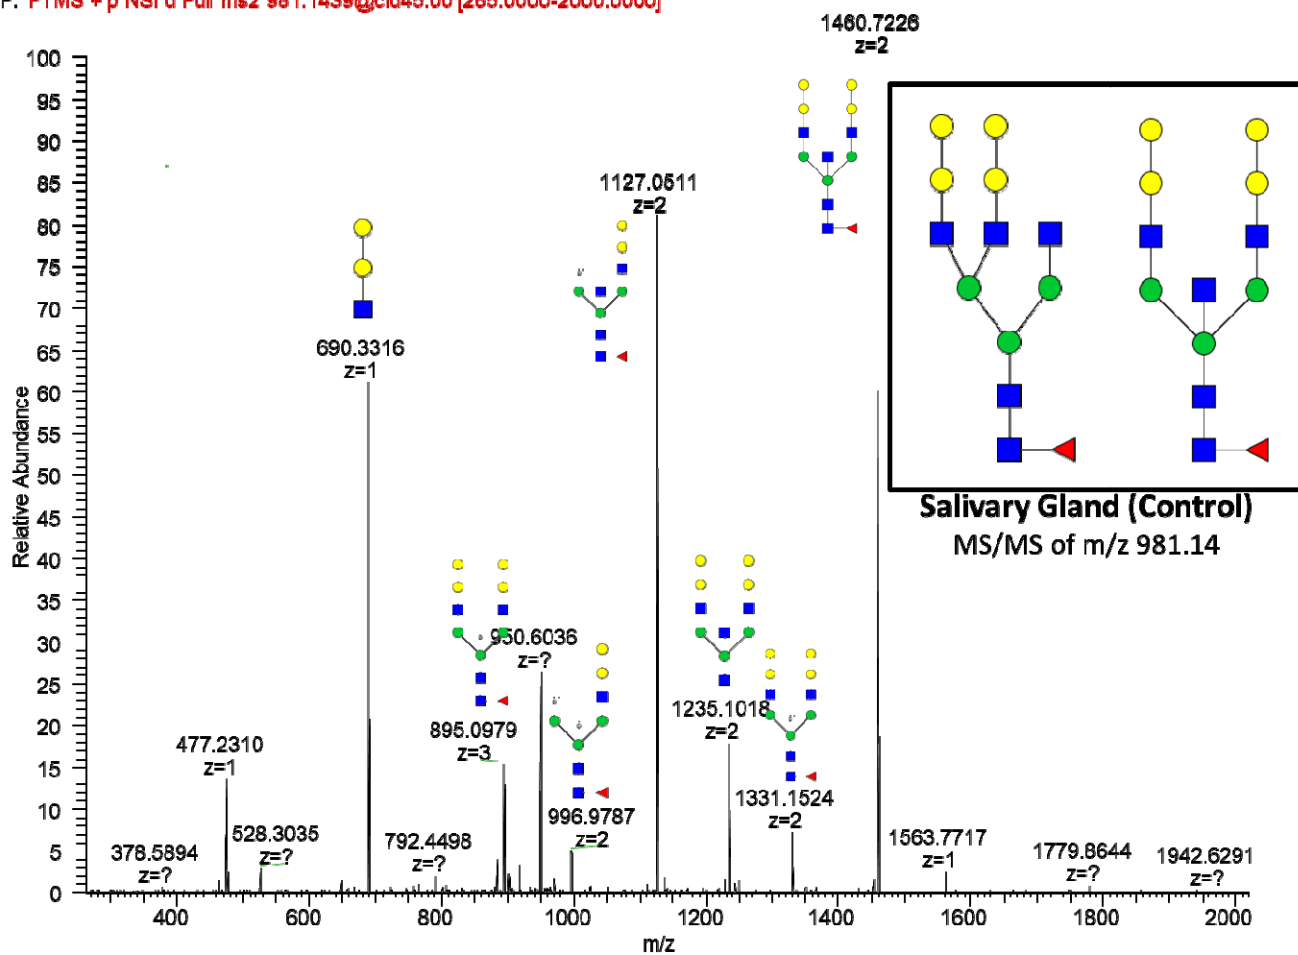

SK\_DSSG\_DDS\_20181212033539 #243-4987 RT: 2.05-16.66 AV: 9 NL: 3.29E4  
 F: FTMS + p NSI d Full ma2 1010.9958@cid45.00[273.0000-2000.0000]

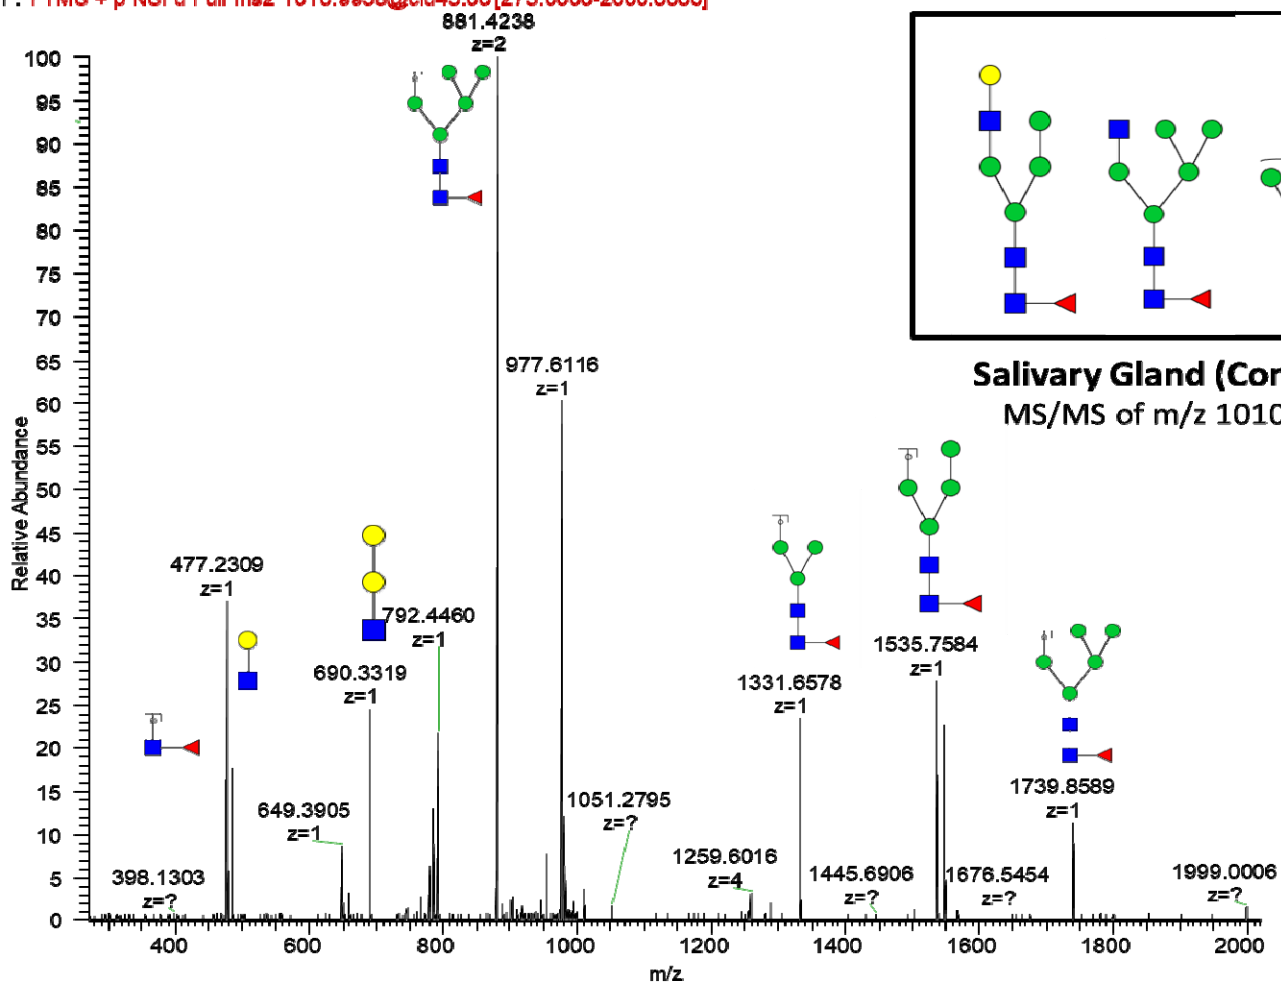

SK\_DSSG\_DDS\_20181212033539 #1207-5057 RT: 5.92-19.39 AV: 6 NL: 2.36E4  
F: FTMS + p NSI d Full ms2 1133.5562@cid45.00 [307.0000-2000.0000]

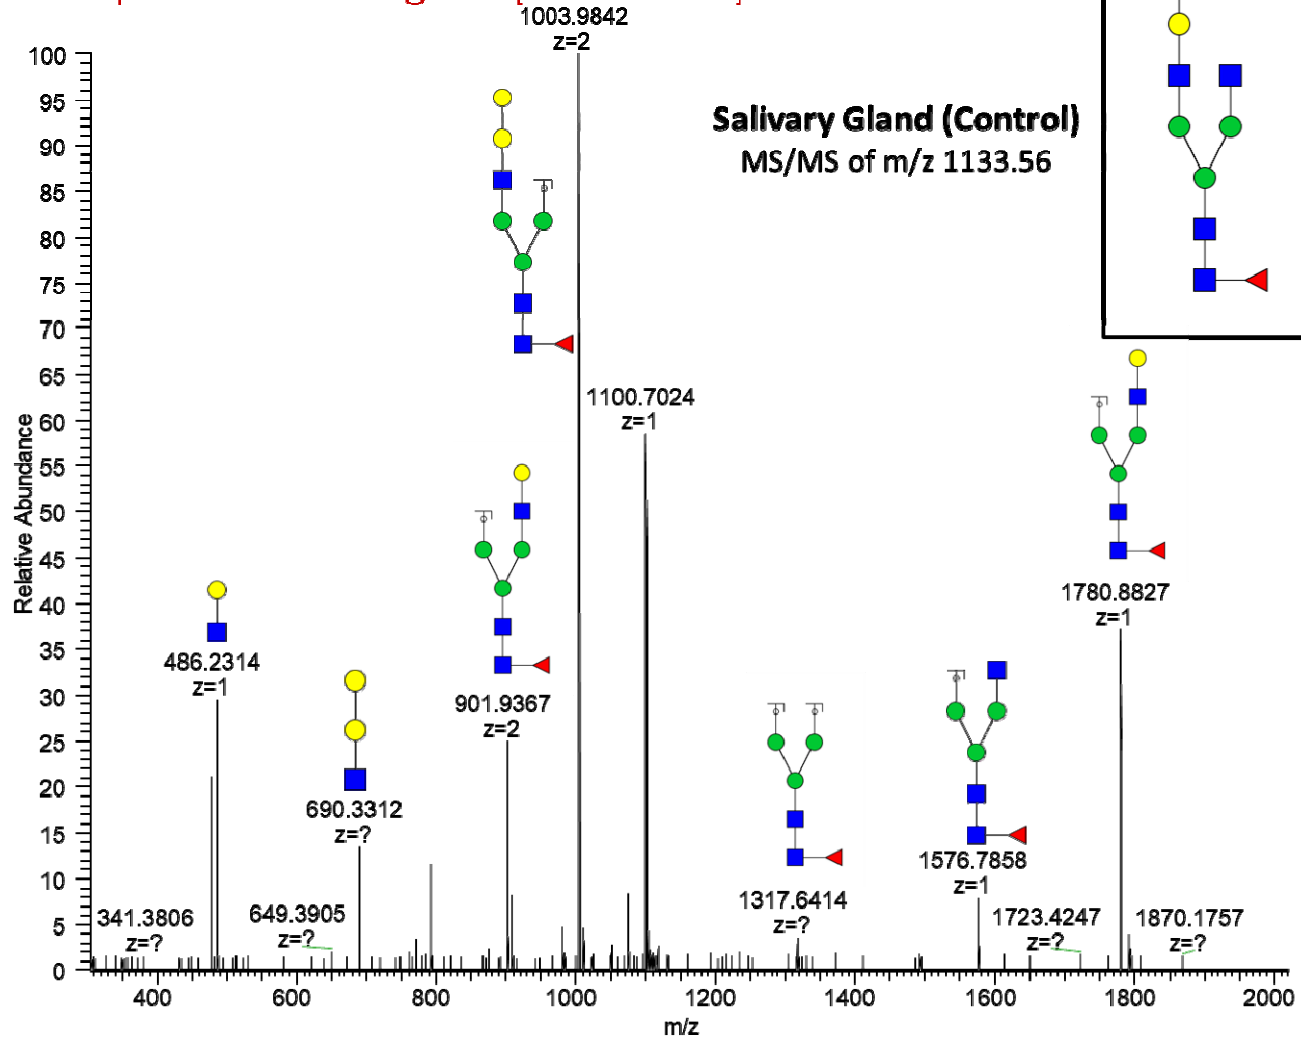

SK\_DSSG\_DDS\_20181212033539 #4713 RT: 18.62 AV: 1 NL: 1.44E4  
F: FTMS +p NSI d Full ms2 1250.6174@cld45.00[339.0000-2000.0000]

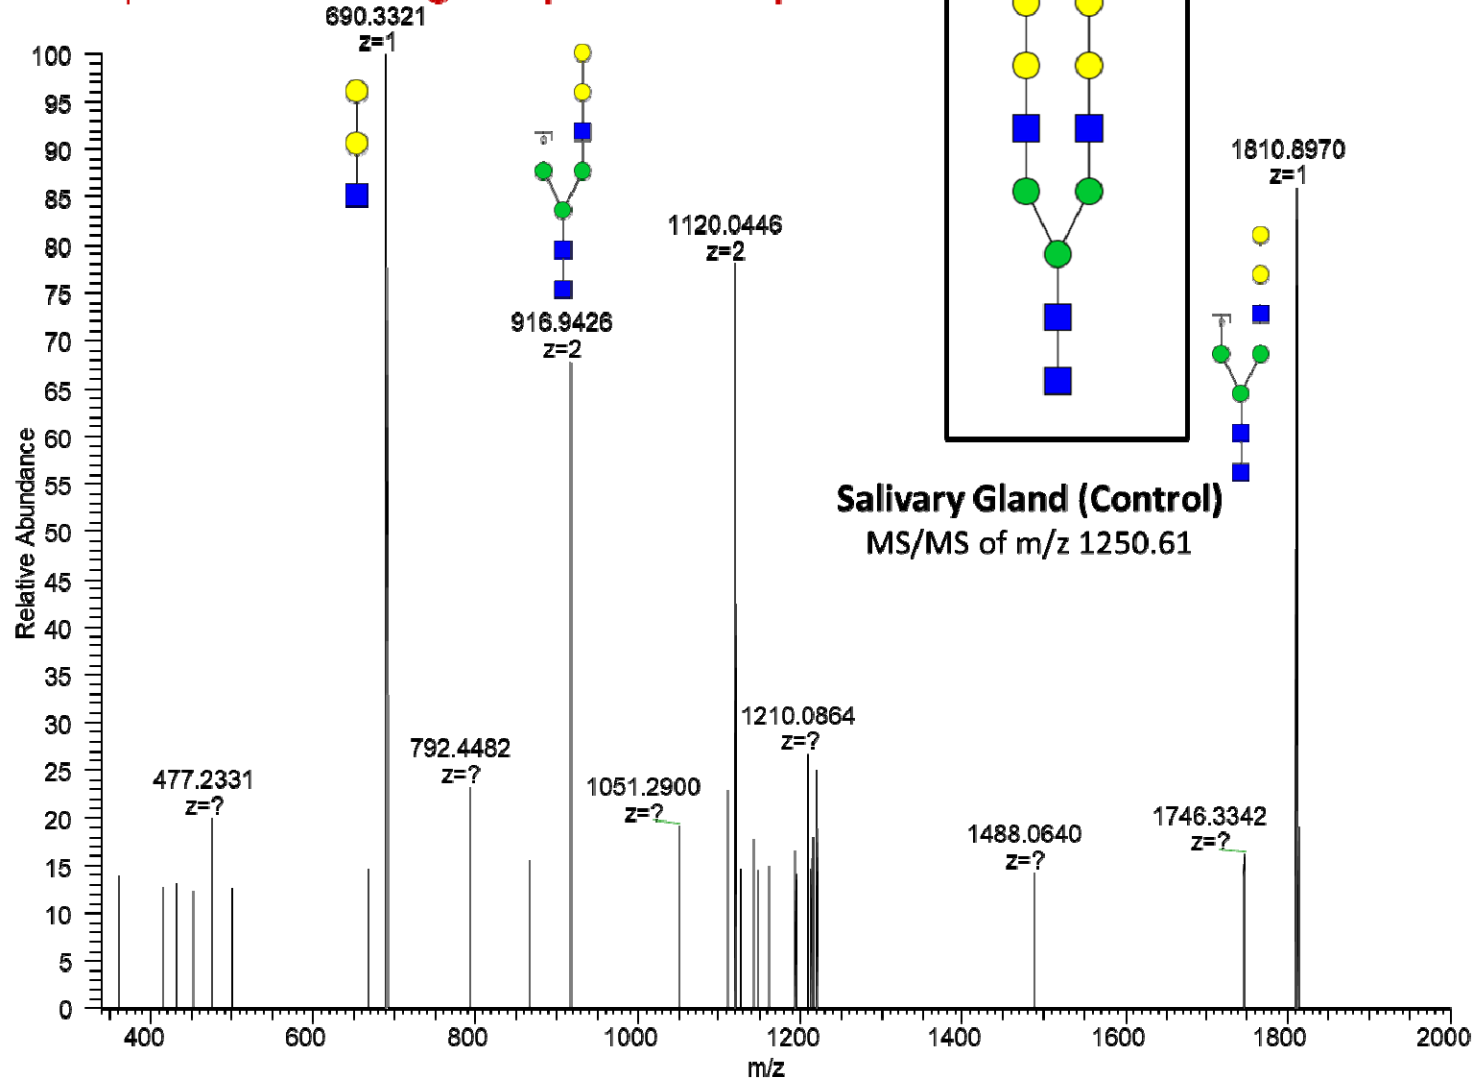



SK\_DSSG\_DDS\_20181212033539 #318-5057 RT: 3.31-19.67 AV: 8 NL: 2.14E  
F: FTMS + p NSI d Full ms2 1337.6570@cid45.00 [363.0000-2000.0000]

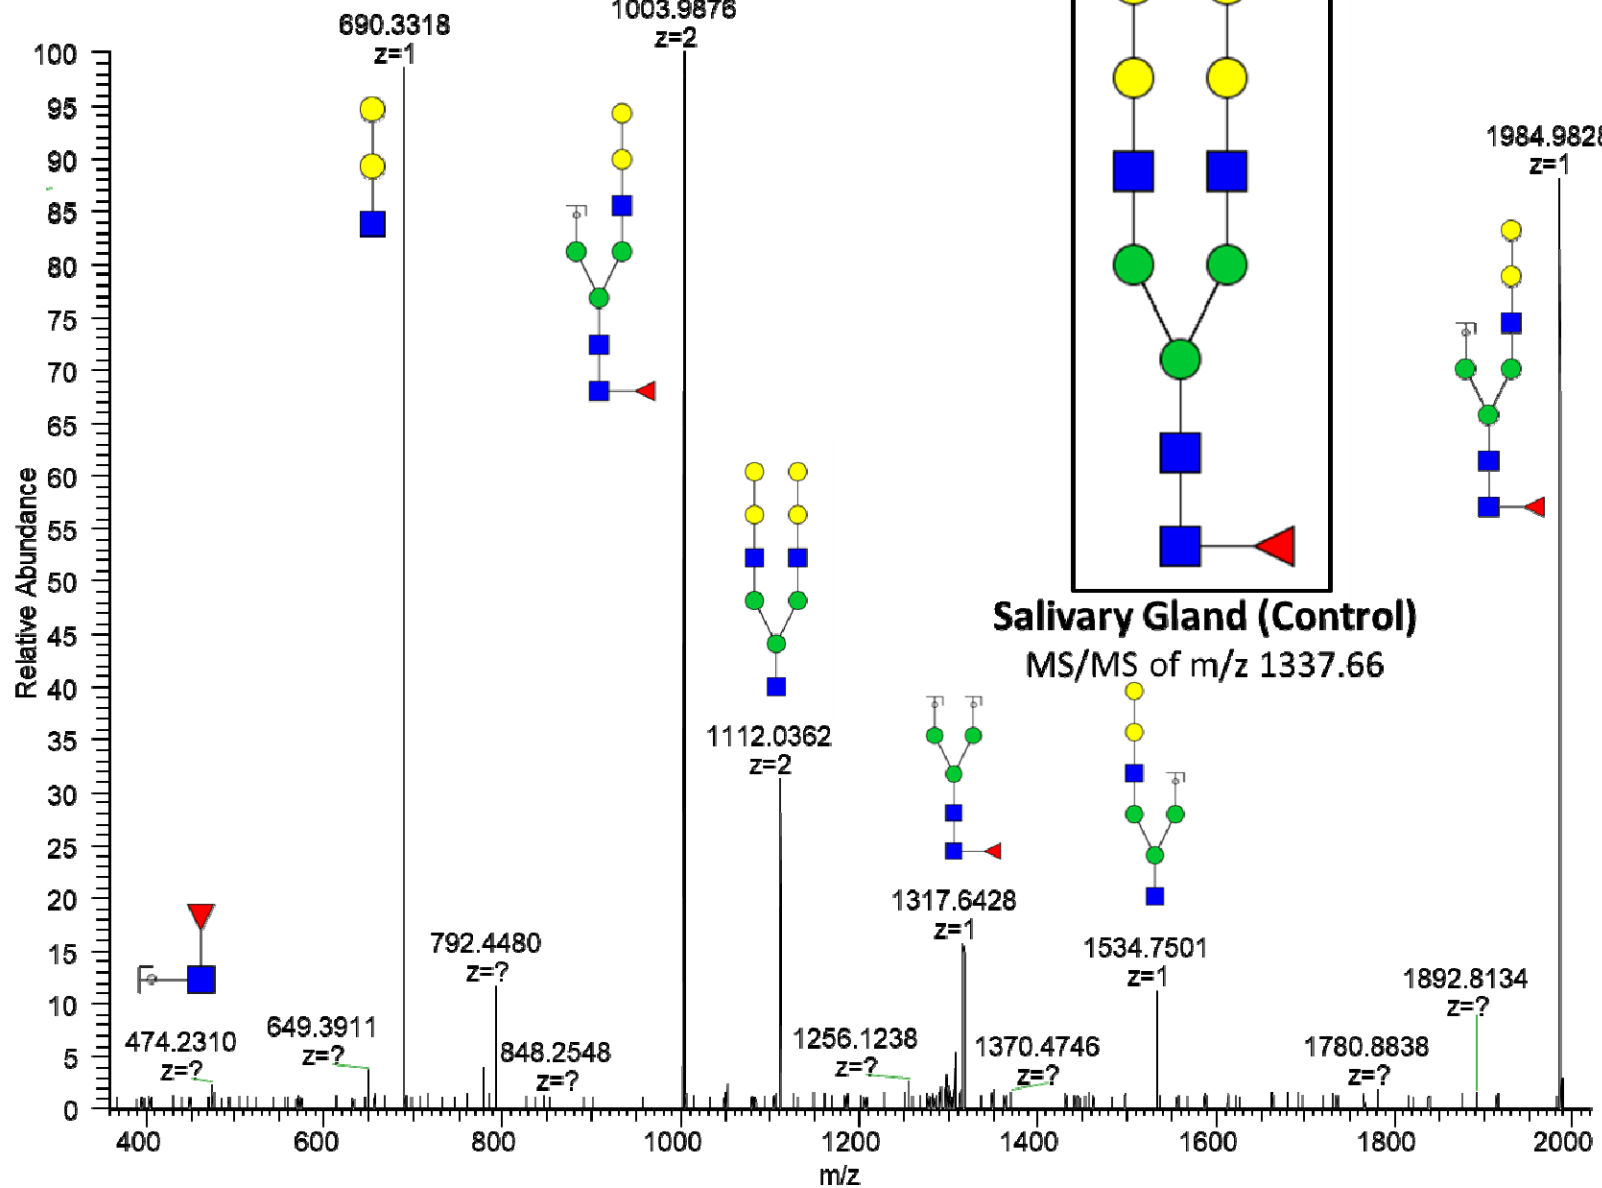

SK\_DSSG\_DDS\_20181212033539 #370-4405 RT: 1.73-16.18 AV: 7 NL: 6.11E4  
F: FTMS + p NSI d Full ms2 923.1150@cd45.00[249.0000-2000.0000]

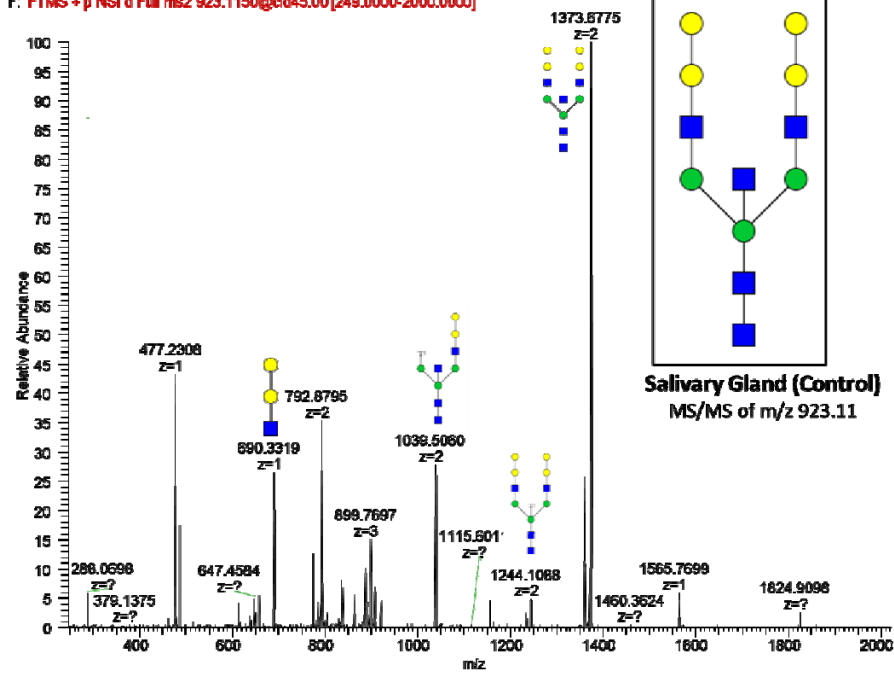

SK\_DS6G\_DD8\_20181212033639 #00-1696 RT: 2.25-13.62 AV: 6 VL: 1.1256  
F FTMS + p NSI G Full ms2 661.1436@sid49.00 [268.0000-2000.0000]

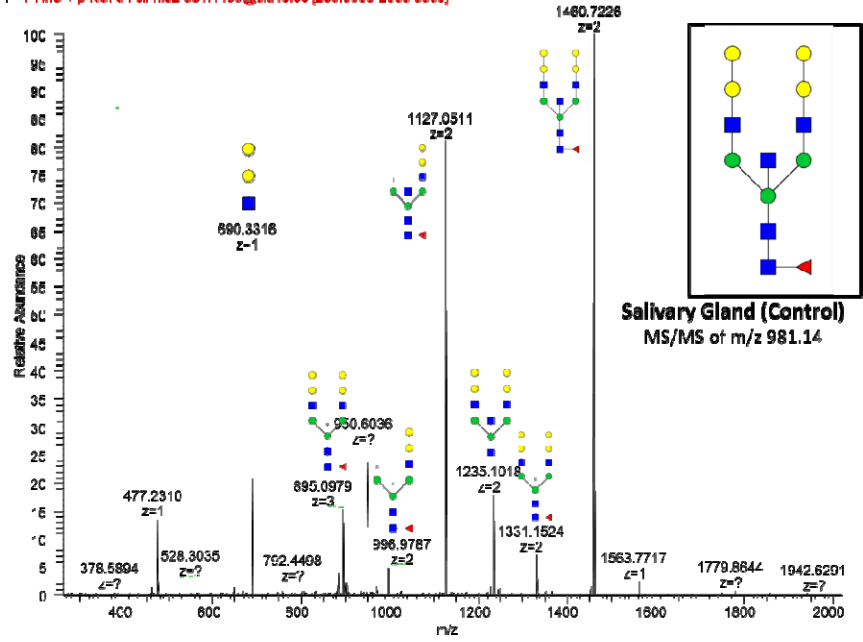

SK\_D5F8G\_CC6 #709-4806 RT: 4.52-19.36 AV: 2 NL: 1.78E4  
F: FTMS + p h8i d Full m/z 923.95 @cid45.00 [249.0000-1859.0000]

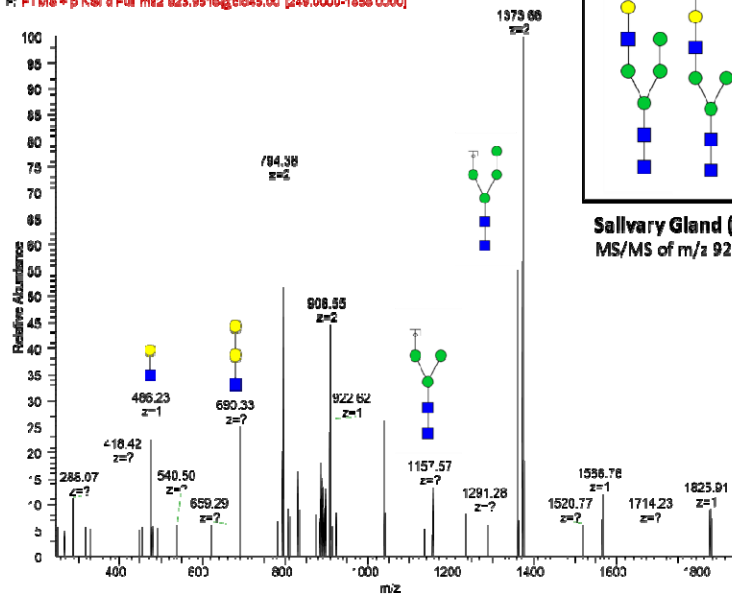

SK\_DSH8Q\_DDS #1-4908 R1: 0.1'-19.86 AV: 10 NL: 4.20E4  
F: TTMO + p NBI d Full m/z 1010.9856@645.00 273.0000-2000.0000

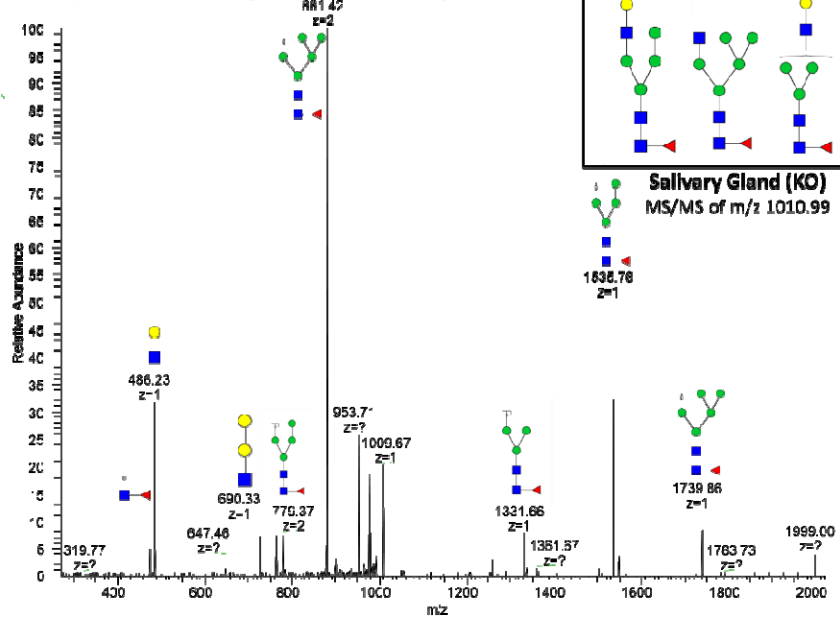

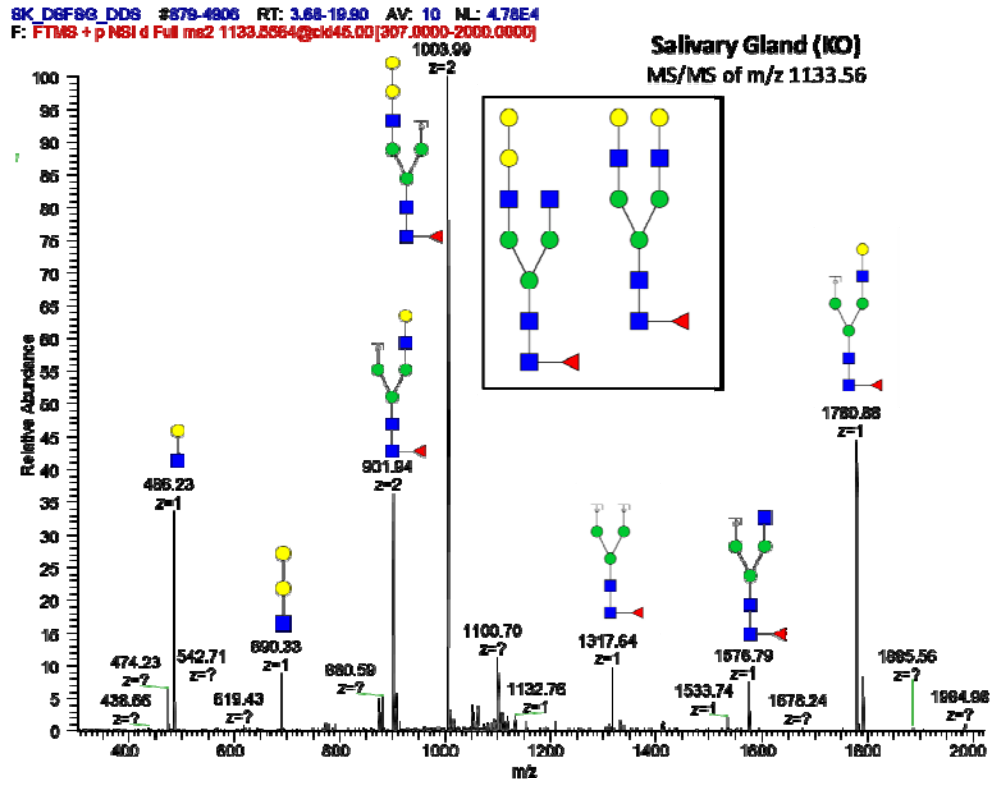

SK\_DSFGS\_DDS\_20181212044906 #449 RT: 2.15 AV: 1 NL: 1.82E5  
F: FTMS + p NSI d Full ms2 899.4364@cid45.00 [242.0000-2000.0000]

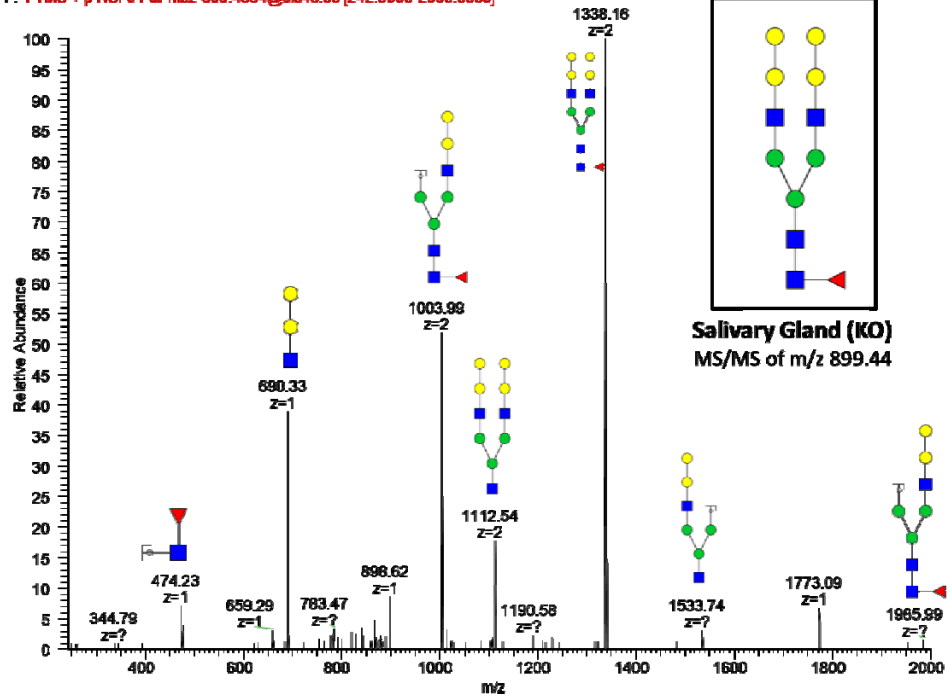

Source: https://www.biorxiv.org/content/10.1101/2021.09.13.460140v1.full.pdf
